# Supplementary material for: Large-scale plasma proteomics comparisons through genetics and disease associations
Source: PubMed Central journal article supplement (PMC10567571; doi:10.1038/s41586-023-06563-x), 2023-10-04
Supplement: 41586_2023_6563_MOESM1_ESM.pdf [file 41586_2023_6563_MOESM1_ESM.pdf]

---

**Supplementary information**

---

**Large-scale plasma proteomics comparisons through genetics and disease associations**

---

In the format provided by the authors and unedited

# 1 Supplementary Notes

## 2 **SN1. Comparison of CV from repeated samples and control samples**

3 Both the Olink and SomaScan platforms include repeated measurements of control samples for quality  
4 control purposes. Prior research using CV of such control samples as a measure of precision has  
5 demonstrated lower CV for assays on a previous version of the SomaScan platform (1.2K) than on the  
6 Olink Explore 1536 platform<sup>1-3</sup>. We observe similar results in our data: on control samples, the CV of  
7 SomaScan assays is on average smaller than the CV of Olink assays (Supplementary Table ST6)<sup>1</sup>.

## 8 **SN2. Comparison of batch effects between Olink in UK Biobank and SomaScan in Iceland**

9 Both Olink and SomaScan use repeated measurements of control samples, specific to the platform, for  
10 quality control purposes. Computing the variation in the measurements of the control samples using  
11 either pairs of measurements from the same plate or pairs from different plates allows us to evaluate  
12 to what extent the variation is inherent to the assay itself and to what extent due to variability between  
13 plates, and how those variations relate to the total variation of the assay. We evaluated the variation  
14 in measurement of control samples in the Icelandic data set (measured by SomaLogic) and the UKB  
15 data set (measured by Olink) using the MAD to estimate the standard deviation, calculating the  
16 variance as  $\sigma^2 = (1.4825 * MAD)^2$ . Assuming that the variance on the control samples inherent in the  
17 assay  $\sigma_a^2$  and the variance due to batch effect  $\sigma_p^2$  are not correlated, we can decompose the total  
18 variance of the control sample measurements as  $\sigma_M^2 = \sigma_p^2 + \sigma_a^2$ .

19 In order to determine the impact of the plate effect on measurement results, the plate effect must be  
20 considered in relation to the total variance of the assay,  $\sigma^2$ . We can then evaluate how much of the  
21 total variance is due to the variability inherent in the assay ( $\sigma_a^2/\sigma^2$ ) and how much due to batch effects  
22  $(\frac{\sigma_M^2 - \sigma_a^2}{\sigma^2})$ .

23 We can estimate  $\sigma_a^2$  by using the difference between the two control samples measured on each plate,  
24 while we can estimate  $\sigma_M^2$  by considering the control samples without regards to plate, and  $\sigma^2$  from  
25 all values for the assay in question.

26 The fraction of assay variance explained by the variability inherent in the assay was 0.23 on the Olink  
27 platform and 0.10 on the SomaScan platform, while the fraction of variance explained by batch effects  
28 was 0.06 on Olink and 0.02 on SomaScan (Supplementary Figure SF9).

29 The discrepancy between the assay precision evaluated using the CV of duplicate measurements of  
30 samples and the variation of measurements of control samples may be in part due to the use of  
31 different control samples between the platforms.

32 **SN3. Inter-class correlation:**

33 The median correlation of the different assays for the two measurements of the same sample was  
34 lower for the Olink platform than the SomaScan platform (Spearman  $r=0.78$  vs  $0.99$ , respectively,  
35 Mann-Whitney  $p=6.6 \times 10^{-130}$ ). Both platforms emphasize the relative quantification within each assay,  
36 and neither of the platforms makes a claim towards the comparability of inter-class measurements. In  
37 fact, the normalization process for the Olink data shifts the median measurement for each assay to 0,  
38 and the difference between the levels of any two proteins on the Olink assay are therefore purely due  
39 to the position of the individual sample within the distribution of the assay. Conversely, for the  
40 SomaScan platform, the levels measured by two different assays can have vastly different medians, to  
41 the extent that the variation within each assay is dominated by the difference in medians. This ensures  
42 that for such SomaScan assays, any two measurements done with the assay with the higher median  
43 will always be higher than any two measurements done with the other, leading to stronger inter-class  
44 correlation between them. When adjusting for differences in data processing by shifting the median  
45 for each assay on each platform to 0, the median correlation remained lower for Olink than for  
46 SomaScan, although the difference was smaller (Spearman  $r=0.78$  vs  $0.83$ , respectively, Mann-Whitney  
47  $p=6.4 \times 10^{-7}$ ; Supplementary Figure SF5).

48 **SN4. The impact of SomaScan SMP normalization**

49 As a normalization step, SomaScan scales each sample to conform to a reference population. This is  
50 done by calculating a scaling factor for each assay relative to a reference sample, averaging this scaling  
51 factor over all assays in the same dilution group, and applying the resulting scaling factor to all assays  
52 in the dilution group. While this can serve to reduce variation between samples, this may not always  
53 be desirable, as this has the effect of potentially removing large-scale variation in protein levels,  
54 affecting multiple proteins. Some studies therefore forego this normalization<sup>4</sup>. Here, we briefly note  
55 how the SMP normalization affects the present analysis.

56 SMP normalization reduces the median CV of the SomaScan assays (SMP: 9.9%, no SMP: 16.2%,  
57 Wilcoxon signed-rank  $p < 10^{-300}$ ).

58 The SMP normalization significantly reduces the median correlation between matching assays from  
59 the SomaScan and Olink platforms (SMP:  $r=0.33$ , no SMP:  $r=0.39$ , Mann-Whitney  $p=1 \times 10^{-11}$ ), as well as  
60 the median correlation between random pairs of assays from the different platforms (SMP:  $-r=-0.01$ ,  
61 no SMP:  $r=0.08$ , Mann-Whitney  $p < 1 \times 10^{-300}$ ). SMP normalization also had a large effect on median  
62 within-platform correlation (SMP:  $-0.08$ , no SMP:  $0.42$ , Mann-Whitney  $p < 1 \times 10^{-300}$ ).

63 Using non-normalized data, the levels of 79% of SomaScan assays associated with age and 58%  
64 associated with sex (Supplementary Table ST14). The SomaScan normalization factors were associated  
65 with age and sex and affected the association with the normalized data accordingly (Supplementary  
66 Table ST14). The correlations between age and sex effects were less consistent between Olink and  
67 SomaScan (Spearman correlation=0.53 for age and 0.57 for sex).

68 In Iceland, we found 355,938 protein-phenotype associations ( $p < 1.0 \times 10^{-5}$ ) in the non-normalized  
69 SomaScan data (Supplementary Table ST16) compared to 218,503 associations for the SMP-  
70 normalized SomaScan data. Of these, 173,912 were significant for both normalization methods; 49%  
71 and 80% of the associations for the non-normalized and normalized data, respectively. However, 18%  
72 of the protein phenotype associations that were significant for both normalization methods had a  
73 discordant direction of effects. The direction of association was more likely to be concordant between  
74 non-normalized and normalized levels for positive associations (94%) than negative ones (78%). The  
75 discordant associations were mostly with phenotypes that are likely to associate with overall protein  
76 concentration, e.g., body mass index, blood cell counts, and markers of inflammation, liver function,  
77 and kidney function.

78 We identified 1,889 and 16,778 sentinel *cis* and *trans* pQTLs using the non-normalized SomaScan data,  
79 respectively, and 2,120 and 22,616 sentinel *cis* and *trans* pQTLs using the SMP normalized data (Table  
80 1). Most non-normalized sentinel *cis* and *trans* pQTLs corresponded ( $r^2 > 0.8$ ) to a sentinel normalized  
81 pQTL: 89% and 74%, respectively (Supplementary Tables ST19 and ST20).

82 In Iceland, we performed 164 billion tests (4,907 assays  $\times$  33.5 million variants), detecting 18,667 and  
83 24,736 sentinel pQTLs for the non-normalized and normalized analyses, respectively, corresponding to  
84 estimated false discovery rates of 1.6% and 1.2%.

85 Using non-normalized SomaScan data we found 38 pQTLs associating with more than 50 proteins.  
86 compared with 35 using the SMP-normalized data. The pleiotropic SomaScan pQTLs each had at least  
87 27 protein associations for either normalization method, indicating that the normalization does not  
88 create or remove pleiotropic pQTLs. However, the pattern of association was substantially altered by  
89 normalization for some pleiotropic variants. For example, the del12 variant in *ASGR1* went from  
90 affecting 556 proteins positively and no proteins negatively in the non-normalized data, to affecting  
91 288 proteins positively and 331 proteins negatively in the normalized data.

92 We identified 1,889 and 16,778 sentinel *cis* and *trans* pQTLs using the non-normalized SomaScan data,  
93 respectively, and 2,120 and 22,616 sentinel *cis* and *trans* pQTLs using the normalized data (Table 1).  
94 The normalization suggested by SomaLogic leads to the detection of more pQTLs. However, this  
95 normalization correlates associates with many processes that affect the levels of multiple proteins.

96 This is reflected by discordant correlations between protein levels and phenotypes related to BMI,  
97 inflammation, blood cell counts, and kidney and liver function and by the drastic effects of  
98 normalization on pleiotropic variants like the ASGR1 variant which associates with higher levels of  
99 many proteins in non-normalized data. Notably, the normalization decreases the correlation between  
100 Olink and SomaScan assays, probably because it is adjusting out some of the biological variability as  
101 previously described. However, the power to detect protein associations with sequence variants and  
102 phenotypes that are not pleiotropic tends to increase following normalization.

### 103 **SN5. Between-platform correlation of protein levels for shared targets**

104 As the Olink NPX normalization leads to the mean level of each protein being 0 across the data set,  
105 there is no correlation on median protein levels between platforms, and neither can the variation in  
106 protein level IQR be explained by the intensity on the Olink platform. However, the protein level IQR  
107 was correlated between the two platforms (Spearman correlation 0.12,  $p=1.70\times 10^{-8}$ ), and on both  
108 platforms, higher IQR was correlated with better correspondence with the matching assay (Spearman  
109 correlation for Olink assay IQR 0.28,  $p=4.84\times 10^{-39}$ ; for SomaScan assay IQR 0.52,  $p=1.57\times 10^{-144}$ ,  
110 Supplementary Figure SF2). This indicates that if either of a pair of assays has a low variation in levels,  
111 the correlation with the corresponding assay tends to be low.

112 Olink's data processing shifts the mean of the measurements for each protein to 0. Therefore, the  
113 comparison of the correlation of assay intensity with the correlation between the assays is not  
114 informative.

### 115 **SN6. Between-platform ranking of assays by correlation of levels**

116 To assess whether the matching assays on the two platforms are measuring the same proteins, we  
117 compared the levels of all pairs of targeted proteins between platforms. For each assay, we ranked the  
118 assays on the other platform by their correlation with the given assay (Supplementary Figure SF3). For  
119 Olink Explore assays, the matching SomaScan assay (with the highest correlation, if more than one was  
120 matching) ranked in the top 1% of all assays in 874 of 1,864 cases. Conversely, for SomaScan assays,  
121 the matching Olink Explore assay (with the highest correlation, if more than one was matching) ranked  
122 in the top 1% of all assays in 968 of 1,994 cases.

### 123 **SN7. Association of ADM with heart failure**

124 In addition to BNP, we noted an association with levels of protein encoded by the Adrenomedullin  
125 gene (*ADM*) which encodes pro-adrenomedullin which is cleaved into two peptides, ADM  
126 (adrenomedullin) and PAMP (proadrenomedullin N-terminal 20 peptide). Two assays on SomaScan  
127 (7922-5 and 14115-34) target protein products encoded by *ADM* and the correlation between them is

128 low ( $r=-0.12$ ). A protein product encoded by *ADM* is also targeted on the Olink platform. One of the  
129 SomaScan assays correlates positively with the Olink assay (7922-5;  $r=0.42$ ) whereas the other does  
130 not (14115-34;  $r=-0.24$ ). Furthermore, both the Olink assay and the positively correlated SomaScan  
131 assay (7922-5) have a *cis* pQTL, while the negatively correlated SomaScan assay (14115-34) does not.  
132 Both the Olink assay and the positively correlated SomaScan assay (7922-5) associate with heart  
133 failure. Levels of products encoded by *ADM* have a strong association with heart failure on Olink  
134 ( $OR=1.85$  per SD,  $p=6.69\times 10^{-72}$ ), but a weaker association on the SomaScan 7922-5 assay ( $OR=1.23$  per  
135 SD,  $p=2.69\times 10^{-19}$ ). This is consistent with reports of elevated circulating ADM in heart failure<sup>5</sup>. In  
136 contrast, the negatively correlated SomaScan assay (14115-34) is negatively associated with heart  
137 failure ( $OR=0.81$  per SD,  $p=2.49\times 10^{-23}$ ). This underlines the need for detailed characterization of the  
138 proteoforms measured.

### 139 **SN8. Our pQTL analyses using Olink in UK Biobank**

140 In the UKB-BI Olink data, for 19% of the 26,926 sentinel pQTL associations, a secondary variant in the  
141 same region associated with the same protein based on conditional analysis (8,640 secondary  
142 associations in *cis* and 5,592 in *trans*). Combined, we found a total of 41,158 sentinel and secondary  
143 pQTL associations.

144 Most Olink sentinel *cis* pQTL associations had secondary pQTL associations (1,702 of 2,102; 81%), in  
145 contrast to only 3,340 (13%) of the 24,824 sentinel *trans* pQTL associations.

146 Of the Olink pQTLs, 6,530 (73%) associated with the level of a single protein, 2,154 (24%) with levels  
147 of two to nine proteins, and 320 (4%) with levels of ten or more proteins. We refer to pQTLs that were  
148 associated with levels of fewer than ten proteins as *specific* and the rest as *nonspecific*. Specific variants  
149 were associated with 2,416 (82%) of the Olink assays.

150 Of the 2,931 Olink assays for which GWAS analysis was performed, 3% had only *cis* pQTLs, 18% had  
151 only *trans* pQTLs and 68% had both *cis* and *trans* pQTLs. Furthermore, 10% had no pQTLs, whereas 9%  
152 had a single pQTL and 82% had two or more pQTLs.

### 153 **SN9. Subsampling and accounting for the different number of variants tested**

154 We performed a power analysis showing that reducing the sample size in the UK Biobank to be equal  
155 to the sample size in Iceland ( $n=35,892$ ) would be expected to result in the detection of 3% fewer  
156 sentinel *cis* pQTL and 34% fewer *trans* pQTL associations: if the sample size in UKB were 35,892, for  
157 the overall set of assays, we would expect to detect 2,021 of the sentinel *cis* associations (96% of the  
158 2,102 detected in the full set of individuals), and 16,399 of the sentinel *trans* associations (66% of the  
159 24,824). When restricting to assays measuring proteins targeted by both platforms, we would expect

160 to detect 1,423 of the sentinel *cis* associations (97% of 1,468), and 12,315 of the sentinel *trans*  
161 associations (66% of 18,578). The majority of the comparisons between platforms that we have  
162 performed on pQTL focused on *cis* pQTLs. Using a smaller set (36K) in UK-BI using Olink would therefore  
163 not impact our conclusions since the fraction of assays with *cis* pQTLs in UKB on the overlapping set  
164 would go from 80% to 78% with Olink instead of 60% with SomaScan.

165 In Iceland, we performed 164 billion tests (4,907 assays × 33.5 million variants), detecting 24,736  
166 sentinel pQTLs, corresponding to an estimated false discovery rate of 1.2%. For the UKB-BI data set,  
167 taking into account 169 billion tests (2,931 assays × 57.7 million variants), detecting 26,926 sentinel  
168 pQTL associations corresponds to an estimated false discovery rate of 1.2%.

169 Correcting for the number of variants tested in UKB (57.7 million) would result in a multiple testing  
170 correction threshold in UKB of  $8.7 \times 10^{-10}$  instead of  $1.8 \times 10^{-9}$ . A total of 153 (1%) of the *cis* pQTLs have  
171 significance between those two thresholds and 1,608 (5%) of the *trans* pQTLs. This does not affect the  
172 conclusions of the comparison between the platforms.

#### 173 **SN10. Replication of UKB-BI pQTLs in Icelandic Olink data**

174 We tested the sentinel pQTLs we discovered using the UKB-BI data set for association using Olink data  
175 from 1,514 Icelanders and found 74% and 19% of the *cis* and *trans* pQTL associations to be nominally  
176 significant ( $p < 0.05$ ) and with consistent directions (Supplementary Table ST35). In comparison, a  
177 power analysis resulted in expected proportions of replicated associations of 85% and 35% for *cis* and  
178 *trans* pQTL associations, respectively. The ratio between expected and observed replication was 0.87  
179 and 0.54 for *cis* and *trans* pQTLs, respectively, and while the power analysis represents a best-case  
180 scenario, the replication rate may also be impacted by differences in population and sample handling  
181 and processing (Supplementary Table ST13).

#### 182 **SN11. *Cis* pQTLs in high LD with a PAV and not *cis* eQTL**

183 In general, a *cis* pQTL would be expected to be equally likely to correlate with increased levels of a  
184 protein as decreased. Therefore, the average effect of *cis* pQTLs would be expected to be close to zero.  
185 However, if the pQTL is due to epitope effects, the alternate allele would be more likely to associate  
186 with decreased levels of the protein as measured by the assay. As we have previously observed for  
187 SomaScan, the effect of the alternative allele of *cis* pQTLs not in high LD with a PAV is on average close  
188 to zero<sup>4</sup>. However, when a PAV is in high LD with a *cis* pQTL, we observe a negative effect for the  
189 alternative allele and the negative effect tends to be even stronger when no *cis* eQTL is in high LD.  
190 When the PAV in high LD is annotated as high impact (stop gained, frameshift, splice donor or  
191 acceptor), the negative effect is consistent with expected nonsense-mediated decay, in particular

192 when supported by *cis* eQTL. However, when the PAV in high LD is annotated as moderate impact  
193 (missense, inframe indel, or splice region), the negative effect we observe for the alternative allele is  
194 consistent with epitope effect.

#### 195 **SN12. pQTL replication between the Olink and SomaScan platforms**

196 Replication of pQTLs detected using SomaScan has been attempted using Olink Target for a limited set  
197 of proteins (n=90 and 163)<sup>6</sup>. In those studies, 65% (81% for *cis* and 52% for *trans*) and 67% (93% for *cis*  
198 and 64% for *trans*) of pQTLs identified in the Interval and deCODE studies replicated, respectively<sup>4,6,7</sup>.  
199 Reciprocally, 64% (75% for *cis* and 61% for *trans*) of the pQTLs identified using Olink Target were  
200 replicated using SomaScan (n=163 proteins)<sup>4,6</sup>. A recent study involved a larger number of proteins  
201 targeted by both platforms (n=871) but was limited by the low number of participants measured using  
202 Olink Target (n=485)<sup>8</sup>.

203 In addition to the correspondence of pQTLs, for comparison with previous work in the field, we  
204 checked the replication of pQTLs detected on each of the platforms on the other platform<sup>7,8</sup>. Of the  
205 pQTLs we identified using Olink UKB-BI, we nominally ( $p < 0.05$ ) replicated 70% of sentinel *cis* pQTLs  
206 and 54% of sentinel *trans* pQTLs in the Icelandic SomaScan data (Supplementary Table ST30).  
207 Conversely, we replicated 84% of sentinel *cis* pQTLs and 54% of sentinel *trans* pQTLs detected using  
208 SomaScan data in the UKB-BI Olink data (Supplementary Table ST37). Thus, the replication rate using  
209 Olink for *cis* pQTLs detected using SomaScan was somewhat higher than the replication rate using  
210 SomaScan for *cis* pQTLs detected using Olink.

211 When attempting to replicate sentinel Olink pQTLs in UKB-BI using Icelandic SomaScan data, the  
212 correlation between effect estimates was similar for *cis* pQTLs ( $r=0.51$ ; 95% CI: 0.47-0.55) and *trans*  
213 pQTLs ( $r=0.48$ ; 95% CI: 0.47-0.49) (Extended Data Figure EF7a, b). However, the correlation between  
214 effects was substantially higher for *cis* pQTLs not in high LD with a PAV ( $r=0.63$ ; 95% CI: 0.58-0.66) than  
215 for *cis* pQTLs in high LD with a PAV ( $r=0.42$ ; 95% CI: 0.33-0.50) (Extended Data Figure EF7c). For pQTLs  
216 detected using SomaScan, the correlation with effect estimates using Olink was somewhat higher for  
217 *cis* pQTLs ( $r=0.48$ ; 95% CI: 0.43-0.53) than for *trans* pQTLs ( $r=0.41$ ; 95% CI: 0.39-0.42) (Extended Data  
218 Figure EF7d, e). As in the other direction of replication, the correlation was substantially higher for *cis*  
219 pQTLs not in high LD with a PAV ( $r=0.74$ ; 95% CI: 0.70-0.77) than for *cis* pQTLs in high LD with a PAV  
220 ( $r=0.31$ ; 95% CI: 0.21-0.40) (Extended Data Figure EF7f).

221 Assays targeting proteins with *cis* pQTLs that did not replicate between platforms had lower correlation  
222 between measured protein levels than assays for proteins with replicating *cis* pQTLs (Extended Data  
223 Figure EF7 a, b, d, e; Supplementary Tables ST30, ST31, and ST6). For *cis* pQTLs detected using the  
224 SomaScan v4 platform and replicated on the Olink Explore platform, this is based on 894 replicating



225 and 164 non-replicating pQTLs, while for *cis* pQTLs detected using the Olink Explore platform and  
226 replicated using the SomaScan v4 platform, this is based on 871 replicating and 375 non-replicating  
227 pQTLs.

228 To investigate if the observed difference in replication between the cohorts might be caused by  
229 differences in LD structure, we computed for both cohorts the  $r^2$  in the source population between  
230 each reported sentinel pQTL variant and the variants in the credible sets for the pQTL, and compared  
231 the  $r^2$  for variants in high LD ( $r^2 > 0.8$ ) with their  $r^2$  in the replication cohort.

232 Of the sentinel pQTLs detected in the Icelandic data set, 1,527 out of 9,611 variants (16%) did not map  
233 to the UKB-BI data set, while of the sentinel pQTLs detected in the UKB-BI data set, 3,864 out of 13,641  
234 variants (28%) did not map to the Icelandic data set. In both cases, rare variants ( $MAF < 1\%$ ) were less  
235 likely to map than others, with 444 out of 1,421 (31%) variants detected in Iceland and 616 out of 1,074  
236 (57%) variants detected in UKB-BI failing to map to UKB-BI and Iceland, respectively.

237 Of the variants in high LD with the reported sentinel variant in the Icelandic cohort ( $r^2 > 0.8$ ), 92% were  
238 also in high LD in the UKB-BI cohort, while 89% of the sentinel variants in the UKB-BI cohort were also  
239 in high LD in the Icelandic cohort. A further 5% and 8% of the variants in high LD with the sentinel  
240 reported pQTLs from the Icelandic and UKB-BI data, respectively, had  $r^2$  between 0.6 and 0.8. Thus,  
241 for both cohorts, 97% of the variants in high LD with the sentinel reported pQTL had  $r^2 > 0.6$  in the  
242 replication cohort (Supplementary Figure SF7, Supplementary Tables ST32-ST34). It is therefore  
243 unlikely that the difference in replication rate between the platforms is because of difference in LD  
244 structure between the cohorts.

#### 245 **SN13. Replication of trans pQTLs conditional on cis pQTLs**

246 For pQTLs detected in UKB-BI, subdividing signals into proteins having *cis* pQTLs on neither, only one,  
247 or both platforms resulted in 3%, 2%, and 13%, respectively, of signals having a sentinel corresponding  
248 *trans* pQTL in the Icelandic SomaScan data. Similarly, for pQTLs detected in the Icelandic SomaScan  
249 data, subdividing into proteins having *cis* pQTLs on neither, only one, or both platforms resulted in 3%,  
250 4%, and 25%, respectively, of signals having a sentinel corresponding *trans* pQTL in the UKB-BI Olink  
251 data (Supplementary Table ST35).

#### 252 **SN14. Variants associating with a large number of proteins**

253 The two variants associating with the largest number of proteins based on SomaScan but not on Olink  
254 are close to *CFH* and *SKIV2L*. The two variants associating with the largest number of proteins on Olink  
255 but not on SomaScan are close to *SLC22A4* and *GP6*. The variant at *GP6* is in high LD with a missense  
256 variant (Pro219Ser) in *GP6*, it is an eQTL and a pQTL for GP6, and associates with platelet volume<sup>9</sup> and

257 aggregation<sup>10</sup>. GP6 is the primary glycoprotein receptor that mediates collagen responses in platelets  
258 involved in thrombus formation and the difference in the associations between the platforms may  
259 reflect differences in plasma sample preparation and handling<sup>4,11,12</sup>, as prolonged storage of blood  
260 samples may lead to platelet activation and subsequent secretion of proteins into plasma<sup>11,13</sup>.

#### 261 **SN15. Concurrence between GWAS catalog LD with pQTL and credible set.**

262 For sentinel pQTLs in the Olink UKB-BI data, there were 669,045 pairs where variants in high LD  
263 associated with levels of a particular protein and a phenotype in the GWAS catalog; 4,439 pairs in *cis*  
264 and 664,606 pairs in *trans*. Of those, 2,409 (54%) of the *cis* pairs and 529,604 (79%) of the *trans* pairs  
265 also have the GWAS catalog variant included in the credible set of the pQTL association.

266 For sentinel pQTLs in the Icelandic SomaScan data, there were 300,067 pairs where variants in high LD  
267 associated with levels of a particular protein and a phenotype in the GWAS catalog; 3,360 pairs in *cis*  
268 and 296,707 pairs in *trans*. Of those, 1,597 (48%) of the *cis* pairs and 196,836 (66%) of the *trans* pairs  
269 also had the GWAS catalog variant included in the credible set of the pQTL association.

#### 270 **SN16. Proteins targeted by both platforms, same *cis* pQTL for both platforms**

271 The protein encoded by *SULT2A1* (bile salt sulfotransferase) is targeted by both Olink and SomaScan  
272 platforms and the *cis* pQTL from both platforms, rs212100 ( $p=2.2\times 10^{-410}$ ; effect=-0.38 SD) and  
273 chr19:47871693 (non-normalized  $p=2.5\times 10^{-90}$ ; effect=-0.21 SD, normalized  $p=6.5\times 10^{-122}$ ; effect=-0.25  
274 SD), are in high LD ( $r^2=1$ ; MAF=16%). *SULT2A1* levels are correlated between the platforms ( $r=0.48$ ).  
275 We and others have reported association of the minor allele of rs212100 with less gallstone risk<sup>14</sup> and  
276 lower plasma levels of *SULT2A1* using the SomaScan v4 platform<sup>4,15</sup>. The results here using the Olink  
277 Explore platform in UKB confer an independent replication. These variants are reported to be in high  
278 LD with the sentinel *SULT2A1* eQTL (Lung and Liver effect on RNA=-0.90 SD), but not with any PAV.

279 Similarly, we had reported relationship between a *CHRD2* *cis* pQTL and a colorectal cancer risk variant  
280 using SomaScan, implicating *CHRD2* at the locus as the gene through which the effect is likely  
281 mediated in the absence of any associated eQTL or PAV<sup>4</sup>. Consistent with these results, the sentinel *cis*  
282 pQTL (rs11236228; MAF=4%) for *CHRD2* in Olink is in high LD ( $r^2=1$ ) with the disease-associated  
283 variant (rs4944940) with a similar effect ( $p=2.9\times 10^{-374}$ ; effect=-0.68 SD) to the one observed on  
284 SomaScan (effect=-0.62SD), thus providing an independent replication.

#### 285 **SN17. Comparison of pQTLs for IL34**

286 The sentinel *cis* pQTL on Olink for IL34 is a stop-gained variant in *IL34* (rs4985556), located in the last  
287 exon (position 213 of 243 amino acids) and associates with greater Alzheimer's disease (AD) risk

288 (OR=1.08,  $p=2\times 10^{-8}$ )<sup>16</sup>. The stop-gained variant associates with lower IL34 levels ( $p=1.3\times 10^{-3260}$ ; effect=-  
289 1.09 SD; MAF=12%) which is consistent with the predicted loss of function. No *cis* pQTLs were detected  
290 for IL34 on SomaScan, and the correlation between the levels of IL34 measured on the two platforms  
291 is low ( $r=0.04$ ). IL34 promotes microglial proliferation and clearance of soluble amyloid- $\beta$  (A $\beta$ ) and as  
292 such confers neuroprotection against the neurotoxicity of A $\beta$ . It has been proposed that the stop-  
293 gained variant associating with less IL34 could increase AD risk by reducing the neuroprotective  
294 properties of IL34<sup>16</sup>.

### 295 **SN18. Proteins targeted by both platforms, different *cis* pQTL detected by the platforms**

296 In some instances, *cis* pQTLs for a given protein are detected on both platforms but they have little  
297 correlation and only one of them correlates with a disease-associated variants. In the case of the CD58  
298 (Lymphocyte function-associated antigen 3) protein we observed *cis* pQTLs on both the Olink Explore  
299 and SomaScan v4 platforms, however, the *cis* pQTLs were different. The sentinel *cis* pQTL on Olink  
300 Explore (rs10801908, MAF=12%) and SomaScan v4 (rs61789227; MAF=2.1%) have very different minor  
301 allele frequencies and are in low LD ( $r^2=0.04$ ) (Extended Data Figure EF8). However, a secondary *cis*  
302 pQTL for CD58 on SomaScan v4 (rank 2, rs10754443; MAF=11%; effect=-0.10 SD,  $p=3\times 10^{-16}$ ) is in high  
303 LD ( $r^2=0.81$ ) with the sentinel *cis* pQTL on Olink Explore. None of the *cis* pQTLs on the two platforms  
304 associate with a PAV. The correlation between the levels of CD58 measured on the two platforms was  
305 low ( $r=0.02$ ). The sentinel *cis* pQTL (rs10801908) for CD58 on Olink Explore ( $p=2.2\times 10^{-147}$ , effect=-0.26  
306 SD) is reported to associate with 25% less risk of multiple sclerosis (MS)<sup>17,18</sup>. The minor allele of this  
307 variant associated with lower CD58 levels on Olink Explore and less MS risk. The glycoprotein CD58,  
308 also known as lymphocyte-function antigen 3 (LFA-3), is a costimulatory receptor distributed on a  
309 broad range of human tissues including cells of the immune system, making it relevant for autoimmune  
310 diseases, including MS<sup>19</sup>. Based on these results both platforms are likely targeting CD58 and the  
311 discrepancies observed could result from the two platforms targeting different CD58 isoforms, or  
312 multimeric versus monomeric forms.

### 313 **SN19. Proteins targeted by either SomaScan or Olink**

314 Olink Explore 3072 targets 2,923 proteins, of which 1,098 are not targeted by SomaScan v4, including  
315 ITGA11. The minor allele of Val433Met in *ITGA11* (rs2306022; MAF=9%) is the sentinel *cis* pQTL for  
316 ITGA11 ( $p=3.3\times 10^{-6217}$ , effect=-0.37SD) and is reported to confer risk of Dupuytren contracture  
317 (OR=1.27, PP=0.99) and uterine fibroids (OR=1.12, PP=1.00)<sup>20,21</sup> (Supplementary Figure SF8). The fact  
318 that the variant which associates with ITGA11 levels is a PAV, and not a *cis* eQTL, raises the concern  
319 that the observed reduction in ITGA11 may be the result of an epitope effect. Validation of this thus  
320 needs to be performed using an alternative method.

321 Of the 4,719 proteins targeted on SomaScan v4, a total of 2,891 are not targeted on Olink Explore  
322 3072. We have previously reported on instances of *cis* pQTLs on SomaScan for proteins that are not  
323 targeted by Olink and their relationship with disease-associated variants including *GREM1* and  
324 colorectal cancer, *ASIP* and melanoma, and *STAT3* and multiple sclerosis<sup>4</sup> (Supplementary Figure SF8).

#### 325 **SN20. Proportion of assays with *cis* pQTLs on the Olink and SomaScan platforms**

326 A greater fraction of the Olink Expansion set of assays targets intracellular and less abundant proteins  
327 (undiluted) than of the 1536 set. Both these characteristics are associated with lower fraction of assays  
328 having a *cis* pQTL within each set of assays. Consequently, we observe a lower fraction of proteins with  
329 *cis* pQTLs for proteins targeted in the Expansion set of assays than by the initial 1536 set (56% vs 85%).  
330 Similarly, proteins targeted on a previous generation of the SomaScan platform (SomaScan 1.2K,  
331 Supplementary Table ST2) are more likely to have a pQTL in our data than proteins targeted on the  
332 SomaScan v4 platform and not the older version (40% vs 56%). Analyzing only the proteins targeted by  
333 both platforms, and considering separately the 1,109 and 739 proteins included in the 1536 and  
334 Expansion sets, the fraction of proteins with *cis* pQTLs was in both cases greater on Olink than on  
335 SomaScan (87% vs. 67% for 1536 and 67% vs. 51% for Expansion).

336

337

338 **Supplementary tables**

339

| -                 | Olink Explore 3072 | Olink Explore 1536 | Olink Expansion | SomaScan (non-normalized) | SomaScan (normalized) |
|-------------------|--------------------|--------------------|-----------------|---------------------------|-----------------------|
| n_samples         | 1474               | 1474               | 1474            | 229                       | 227                   |
| median cv         | 16.5334            | 13.9926            | 19.1373         | 16.2204                   | 9.8715                |
| q1                | 12.1503            | 10.9256            | 14.1360         | 13.5926                   | 7.2613                |
| mean              | 16.5334            | 13.9926            | 19.1373         | 16.2204                   | 9.8715                |
| q3                | 22.9726            | 20.2436            | 24.3455         | 20.8062                   | 15.2698               |
| iqr               | 10.8223            | 9.3180             | 10.2095         | 7.2137                    | 8.0085                |
| median overlap cv | 14.9084            | 13.2008            | 18.5044         | 15.2557                   | 9.5442                |
| q1 overlap        | 11.5143            | 10.6146            | 13.4038         | 12.7109                   | 7.2322                |
| mean overlap      | 14.9084            | 13.2008            | 18.5044         | 15.2557                   | 9.5442                |
| q3 overlap        | 21.8905            | 18.6046            | 24.2382         | 19.5903                   | 14.4378               |
| iqr overlap       | 10.3762            | 7.9899             | 10.8344         | 6.8794                    | 7.2056                |

340

341 **Supplementary Table ST3:** Distribution of CV for Olink and SomaScan assays

342

| Quantile        | 0.1  | 0.25 | 0.5  | 0.75 | 0.9  |
|-----------------|------|------|------|------|------|
| Intra-assay     |      |      |      |      |      |
| SomaScan (1.2K) | 0.02 | 0.03 | 0.03 | 0.04 | 0.06 |
| SomaScan (all)  | 0.02 | 0.02 | 0.03 | 0.04 | 0.06 |
| Olink (v1)      | 0.03 | 0.03 | 0.05 | 0.07 | 0.11 |
| Olink (all)     | 0.03 | 0.04 | 0.06 | 0.11 | 0.17 |
| Inter-assay     |      |      |      |      |      |
| SomaScan (1.2K) | 0.04 | 0.05 | 0.06 | 0.08 | 0.12 |
| SomaScan (all)  | 0.04 | 0.04 | 0.05 | 0.07 | 0.11 |
| Olink (v1)      | 0.09 | 0.12 | 0.16 | 0.24 | 0.36 |
| Olink (all)     | 0.10 | 0.14 | 0.20 | 0.31 | 0.50 |

343

344 **Supplementary Table ST4:** Assay CV, replicating the results of Katz *et al.*<sup>1</sup>, showing higher precision of  
345 assays on the SomaScan platform. Comparing the assay CV directly does not take into account different  
346 scales of the platforms.

347

348

| -                | Olink vs somascan (non-normalized) | Olink vs somascan (normalized) | SomaScan normalized vs non-normalized |
|------------------|------------------------------------|--------------------------------|---------------------------------------|
| median_corr      | 0.3883                             | 0.3255                         | 0.737                                 |
| min_corr         | -0.2865                            | -0.3548                        | -0.377                                |
| max_corr         | 0.9356                             | 0.9098                         | 1                                     |
| q1_corr          | 0.1124                             | 0.0325                         | 0.556                                 |
| q3_corr          | 0.6254                             | 0.5843                         | 0.8651                                |
| iqr_corr         | 0.513                              | 0.5518                         | 0.3091                                |
| baseline_corr    | 0.0777                             | -0.0055                        | nan                                   |
| q1_baseline_corr | 0.0112                             | -0.0634                        | nan                                   |
| q3_baseline_corr | 0.2142                             | 0.0611                         | nan                                   |

349

350 **Supplementary Table ST5:** Median Spearman correlation between assays on the Olink and SomaScan  
351 platforms using normalized (smp) and non-normalized (pc0) data.

352

353

|                   | Olink dilution |      |      |       |        |          |       |
|-------------------|----------------|------|------|-------|--------|----------|-------|
| SomaScan dilution |                | 1:1  | 1:10 | 1:100 | 1:1000 | 1:100000 | total |
|                   | 1:5            | 1050 | 300  | 107   | 27     | 4        | 1488  |
|                   | 1:200          | 119  | 110  | 116   | 60     | 17       | 422   |
|                   | 1:20000        | 3    | 4    | 11    | 36     | 59       | 113   |
|                   | total          | 1172 | 414  | 234   | 123    | 80       | 2023  |

354

355 **Supplementary Table ST7:** Assay dilution groups for the Olink and SomaScan platforms.

356



|                |          | SomaScan dilution          |       |       |         |       |
|----------------|----------|----------------------------|-------|-------|---------|-------|
|                |          |                            | 1:5   | 1:200 | 1:20000 | all   |
| Olink dilution | 1:1      | count                      | 1050  | 119   | 3       | 1172  |
|                |          | median normalized corr     | 0.157 | 0.273 | 0.105   | 0.161 |
|                |          | median non-normalized corr | 0.240 | 0.301 | 0.197   | 0.243 |
|                | 1:10     | count                      | 300   | 110   | 4       | 414   |
|                |          | median normalized corr     | 0.437 | 0.614 | 0.223   | 0.479 |
|                |          | median non-normalized corr | 0.487 | 0.629 | 0.267   | 0.516 |
|                | 1:100    | count                      | 107   | 116   | 11      | 234   |
|                |          | median normalized corr     | 0.335 | 0.594 | 0.480   | 0.516 |
|                |          | median non-normalized corr | 0.382 | 0.615 | 0.494   | 0.540 |
|                | 1:1000   | count                      | 27    | 60    | 36      | 123   |
|                |          | median normalized corr     | 0.165 | 0.544 | 0.576   | 0.511 |
|                |          | median non-normalized corr | 0.334 | 0.603 | 0.562   | 0.545 |
|                | 1:100000 | Count                      | 4     | 17    | 59      | 80    |
|                |          | Median normalized corr     | 0.138 | 0.359 | 0.451   | 0.426 |
|                |          | Median non-normalized corr | 0.169 | 0.428 | 0.520   | 0.495 |
|                | all      | count                      | 1488  | 422   | 113     | 2023  |
|                |          | median normalized corr     | 0.208 | 0.528 | 0.483   | 0.325 |
|                |          | median non-normalized corr | 0.297 | 0.569 | 0.520   | 0.388 |

357

358 **Supplementary Table ST8:** Median correlation between matching assays on the Olink and SomaScan  
359 platforms by dilution group

360

| platform                | dilution group | count | median cv | count (matching) | median cv (matching) |
|-------------------------|----------------|-------|-----------|------------------|----------------------|
| olink                   | 1:1            | 1961  | 19.75546  | 1091             | 18.50443             |
|                         | 1:10           | 524   | 13.22939  | 384              | 12.81051             |
|                         | 1:100          | 257   | 11.23674  | 211              | 11.03967             |
|                         | 1:1000         | 127   | 11.60512  | 113              | 11.60512             |
|                         | 1:100000       | 72    | 11.11745  | 63               | 11.09153             |
| somascan_non-normalized | 1:5            | 4013  | 9.993957  | 1462             | 9.892588             |
|                         | 1:200          | 791   | 8.973037  | 419              | 8.045246             |
|                         | 1:20000        | 157   | 10.46488  | 113              | 10.27222             |
| somascan_normalized     | 1:5            | 4013  | 16.79949  | 1462             | 16.17287             |
|                         | 1:200          | 791   | 13.58756  | 419              | 12.42079             |
|                         | 1:20000        | 157   | 14.79755  | 113              | 14.37824             |

361

362 **Supplementary Table ST9:** CV by dilution group for all assays on each platform and for the set of  
363 matching assays.

364

365

|               | All proteins according to HPA | SomaScan v4 | SomaScan 1.2k | Olink Explore 3072 | Olink Explore 1536 |
|---------------|-------------------------------|-------------|---------------|--------------------|--------------------|
| Intracellular | 12159 (63%)                   | 2425 (49%)  | 338 (30%)     | 1414 (46%)         | 562 (36%)          |
| Membrane      | 5384 (28%)                    | 1434 (29%)  | 336 (30%)     | 891 (29%)          | 532 (34%)          |
| Secreted      | 1644 (9%)                     | 1064 (22%)  | 443 (40%)     | 751 (24%)          | 463 (29%)          |

366

367 **Supplementary Table ST10:** The difference in protein location (according to Human Protein Atlas; HPA)  
368 between SomaScan and Olink.

369

370

|               |                   | <i>cis</i> | no <i>cis</i> |
|---------------|-------------------|------------|---------------|
| 50% of values | both below LOD    | 185        | 498           |
|               | one below LOD     | 94         | 83            |
|               | neither below LOD | 1823       | 260           |

371

372 **Supplementary Table ST11:** Number of proteins with *cis* pQTL detected or not detected on Olink  
373 depending on if the median of the NPX values was below the limit of detection on the validation sets  
374 of samples from healthy individuals (n=24) and diseased individuals (n=48).

375

|                           | UKB-BI                                                      | Iceland 36k                      | UVS                              | HERA                             |
|---------------------------|-------------------------------------------------------------|----------------------------------|----------------------------------|----------------------------------|
| Country                   | UK                                                          | Iceland                          | Iceland                          | Iceland                          |
| Count                     | 50104                                                       | 36195                            | 17560                            | 18635                            |
| Donor age mean            | 57.9                                                        | 56.3                             | 58.4                             | 54.4                             |
| Donor age std             | 8.1                                                         | 16.9                             | 17.1                             | 16.5                             |
| BMI mean                  | 27.3                                                        | 27.3                             | 26.5                             | 28.2                             |
| BMI std                   | 4.7                                                         | 5                                | 4.6                              | 5.4                              |
| Sex proportion (female)   | 0.54                                                        | 0.57                             | 0.57                             | 0.57                             |
| Bias                      | healthy                                                     | diseased                         | diseased                         | diseased                         |
| Sample age (years) mean*  | 13                                                          | 10.2                             | 16.7                             | 4.2                              |
| Sample age (years) std    | 2.4                                                         | 7.4                              | 1.2                              | 5.4                              |
| Plasma handling protocol  | stand 30min, centrifuge, ship to processing center, aliquot | stand 30min, centrifuge, aliquot | stand 30min, centrifuge, aliquot | stand 30min, centrifuge, aliquot |
| Storage temperature       | -80°C                                                       | -80°C                            | -80°C                            | -80°C                            |
| Freeze-thaw cycles        | 0                                                           | 0                                | 0                                | 0                                |
| Delayed sample handling** | TRUE                                                        | FALSE                            | FALSE                            | FALSE                            |

376

377 **Supplementary Table ST13:** Differences in the UKB-BI and Icelandic cohorts and study characteristics.

378 Age is in years and the unit of BMI is kg/m<sup>2</sup>. \*assuming all SomaScan measurements performed in 2019

379 and all Olink measurements in 2022. \*\*UKB samples were kept at 4°C until they were shipped to

380 processing center for aliquoting, preferably within 24h<sup>12</sup>. Icelandic samples were aliquoted

381 immediately following centrifuging.

382

383

384

| <b>r2 range</b> | <b>uk_to_is</b> | <b>is_to_uk</b> |
|-----------------|-----------------|-----------------|
| 0.0-0.2         | 0.6%            | 1.6%            |
| 0.2-0.4         | 0.5%            | 0.5%            |
| 0.4-0.6         | 1.9%            | 1.1%            |
| 0.6-0.8         | 7.6%            | 5.2%            |
| 0.8-1.0         | 89.3%           | 91.7%           |

385

386 **Supplementary Table ST34:** LD between pQTL variants and credible set variants in UKB-BI and Iceland.  
387 For each pQTL we compute the LD in the source cohort between the pQTL and each variant in the  
388 credible set. For variants in high LD in the source cohort, the table shows the LD of the variants in the  
389 replication cohort. For both directions, 97% of the variant pairs had  $r^2 > 0.6$ .

390

391

392 **Supplementary Figures**

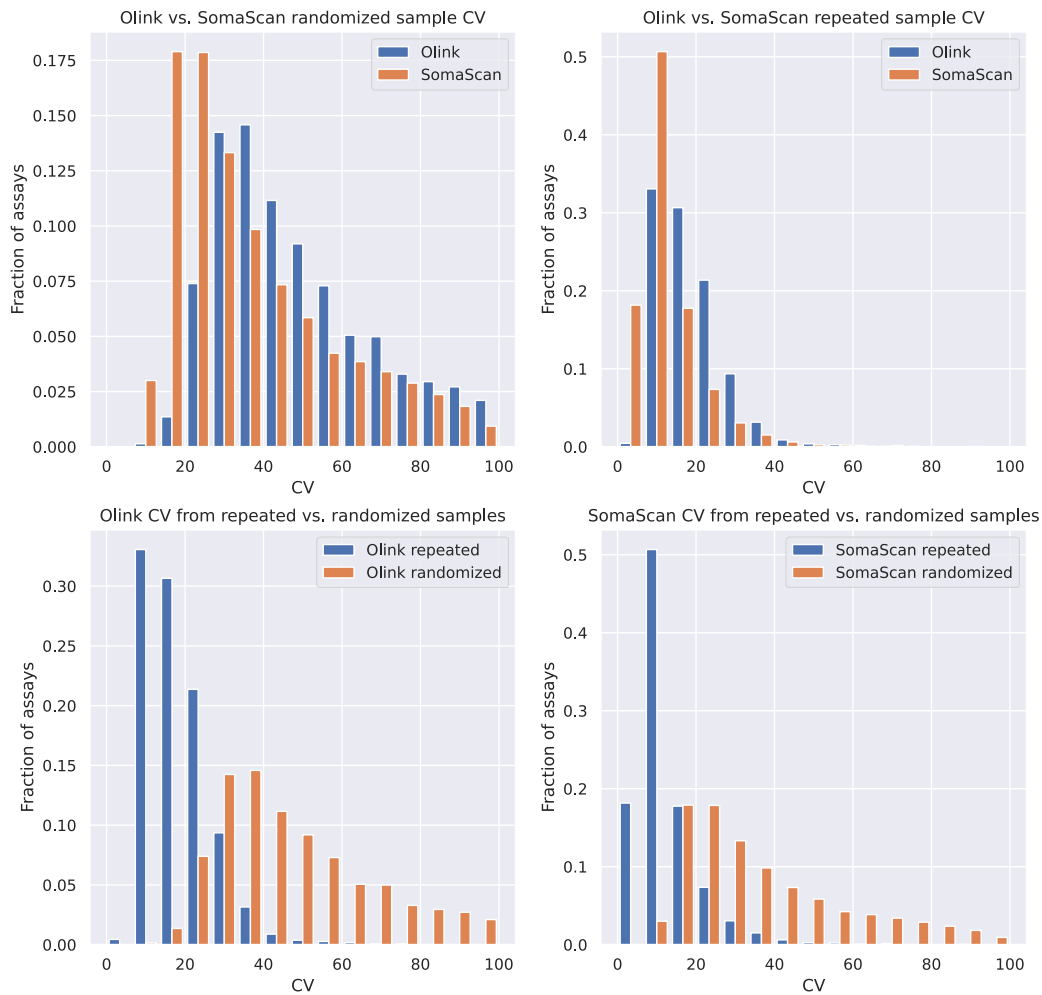

393

394 **Supplementary Figure SF1:** Top row: Comparison of assay CVs on the Olink and SomaScan platforms  
395 computed using random samples (left) and duplicate measurements of samples (right). Bottom row:  
396 Comparison of assay CVs computed using random samples and duplicate measurements of samples  
397 on the Olink (left) and SomaScan (right) platforms.

398

Correlation of assay IQR with inter-platform correlation

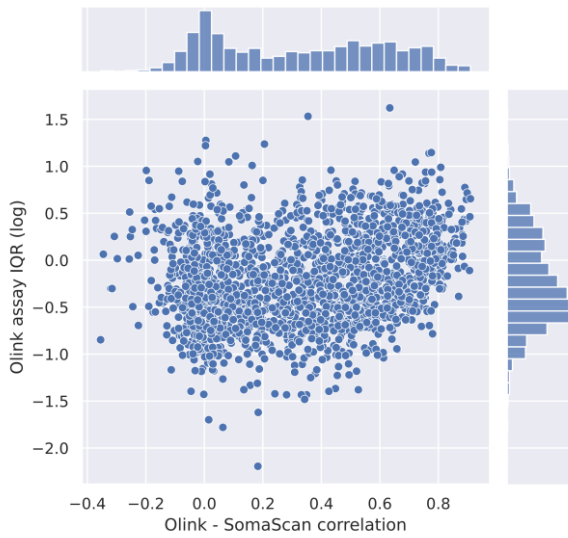

Correlation of assay IQR with inter-platform correlation

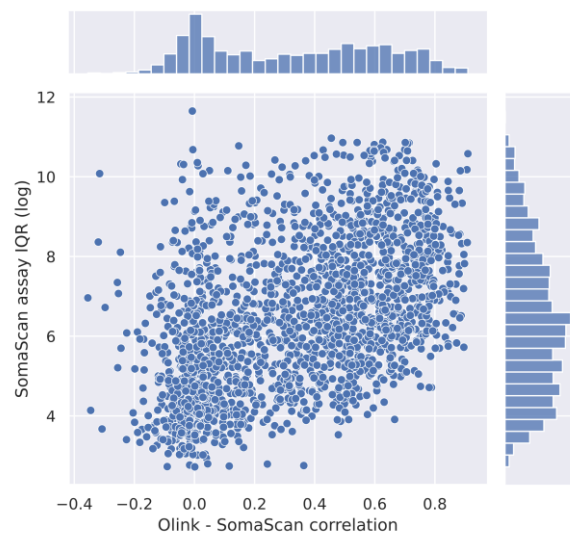

399

400 **Supplementary Figure SF2:** Relationship between assay IQR and inter-platform correlation. Assay IQR  
401 is correlated with inter-platform correlation, with higher assay IQR associating with higher inter-  
402 platform correlation.



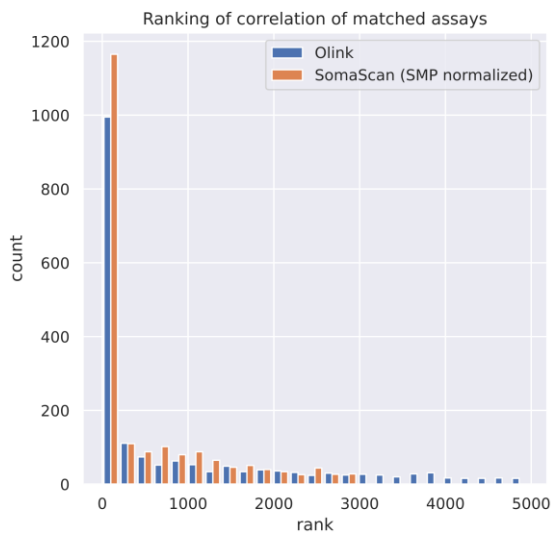

403

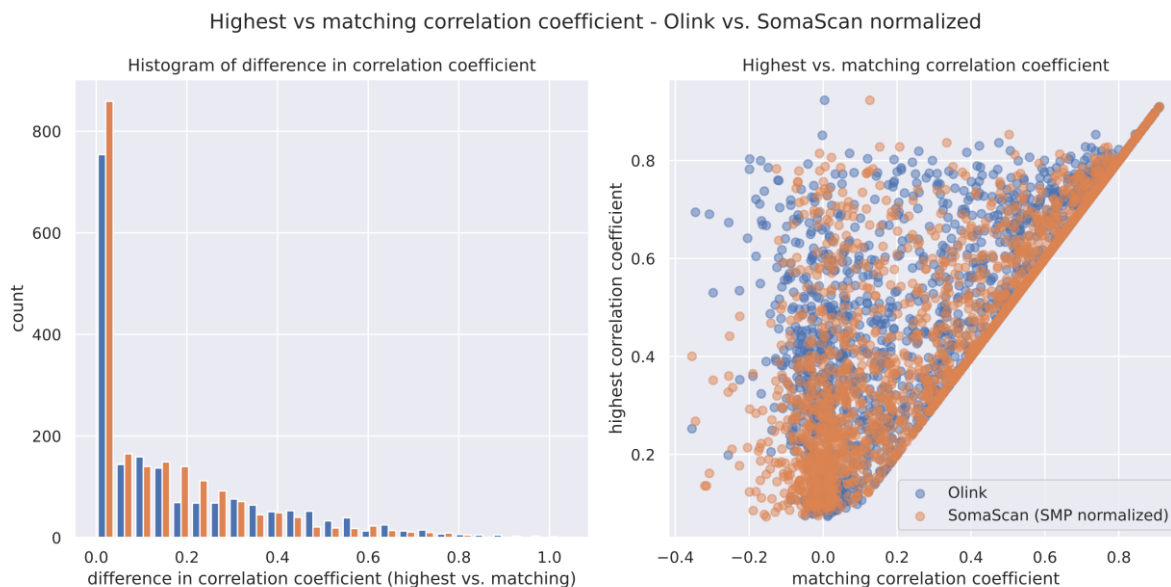

404

405 **Supplementary Figure SF3:** Top: Histogram of the rank of the matching assay compared to all possible  
 406 pairs. For an assay on a given platform, the matching assay on the other platform is among the highest-  
 407 ranked assays on that platform in a majority of cases.

408 Bottom: The difference between the highest correlation coefficient for an assay and the correlation  
 409 coefficient for the matched assay. The histogram shows the distribution of the differences in  
 410 correlation coefficient between the matching assay and the assay with the strongest correlation. The  
 411 right-hand plot shows the distribution of the correlation coefficients. For assays on the diagonal, the  
 412 matching assay is the assay showing the highest correlation in protein levels. For the majority of assays,  
 413 the difference between the strongest correlation and the correlation with the matching assay is small.

414

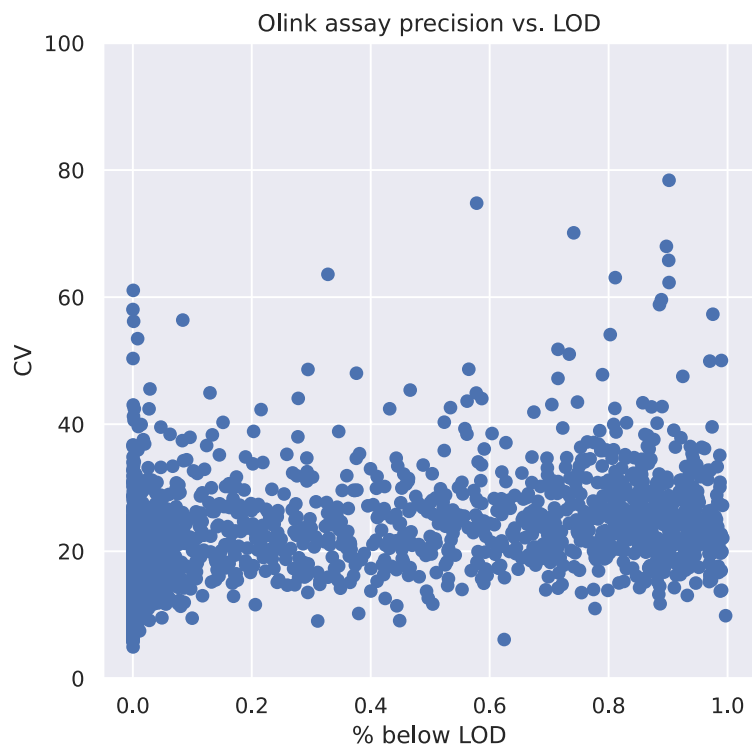

415

416 **Supplementary Figure SF4:** Correlation of CV to percentage of measurements below limit of detection  
417 for Olink assays. The Spearman correlation is 0.69,  $p < 10^{-300}$ .

418

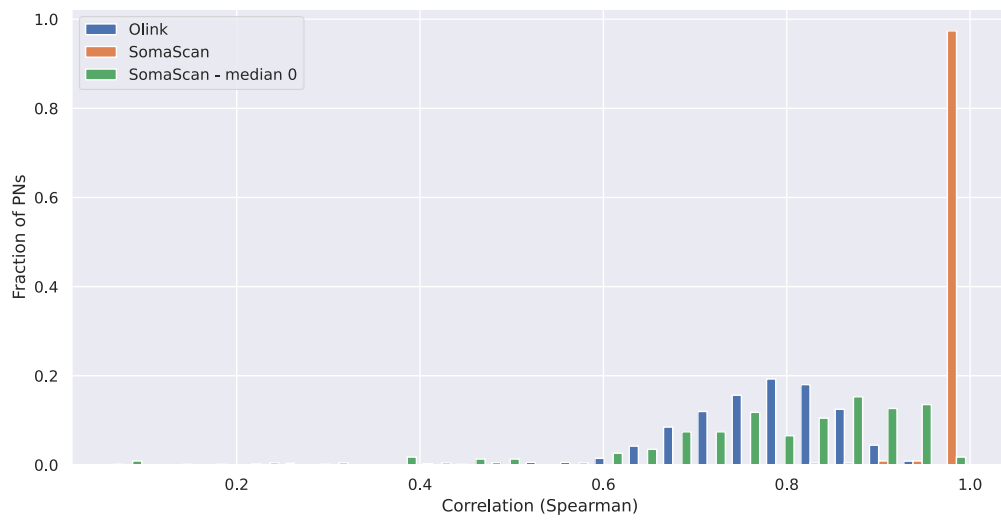

419

420 **Supplementary Figure SF5:** Histogram of intra-class correlation coefficients for Olink (UKB) and  
 421 SomaScan (Iceland 36K) data sets. The correlation is computed for the paired samples in each data set.  
 422 Shifting the values for each assay on the SomaScan platform to have a mean of 0, as is done for the  
 423 Olink assays, greatly impacts the median correlation.

424

425

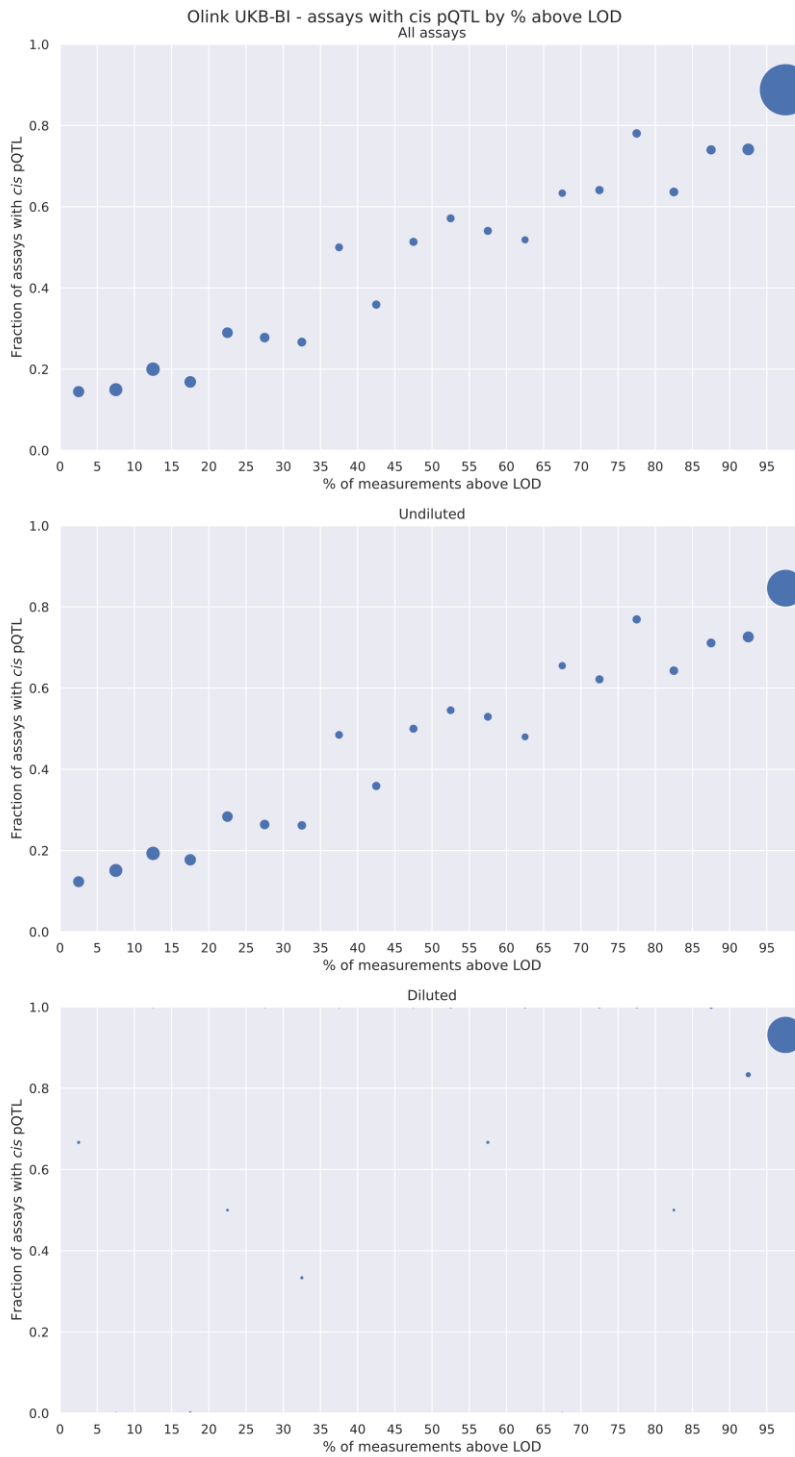

426

427 **Supplementary Figure SF6:** The fraction of assays with a *cis* pQTL compared to the percentage of  
428 measurements above LOD, increments of 5%. The area of the dots represents the number of assays in  
429 each bin.

430

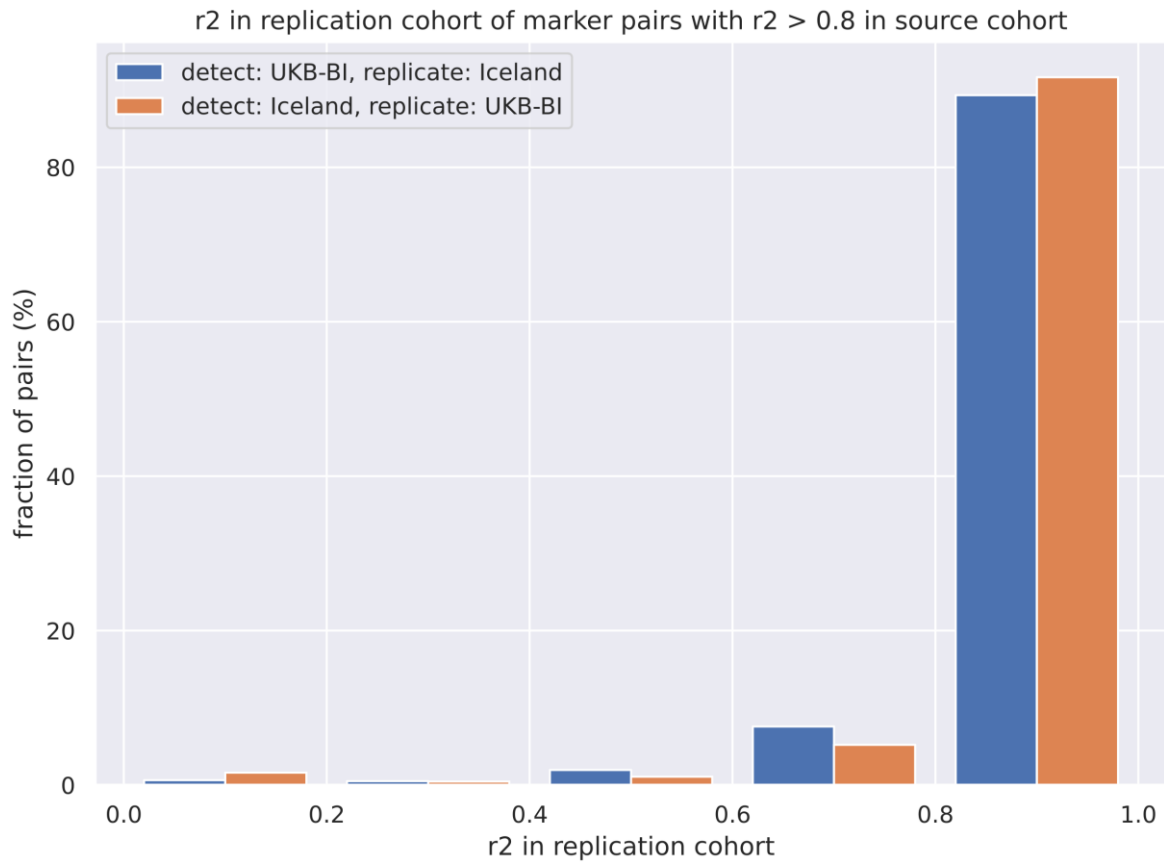

431

432 **Supplementary Figure SF7:** Histogram showing the  $r^2$  in the replication cohort between pairs of a  
 433 sentinel pQTL and a credible set variant from the source cohort having  $r^2 > 0.8$  in the source cohort.  
 434 For pQTLs detected in both data sets, 97% of the pairs have  $r^2 > 0.6$ , with  $r^2 > 0.8$  in about 90% of cases  
 435 (Supplementary Table ST34).

436

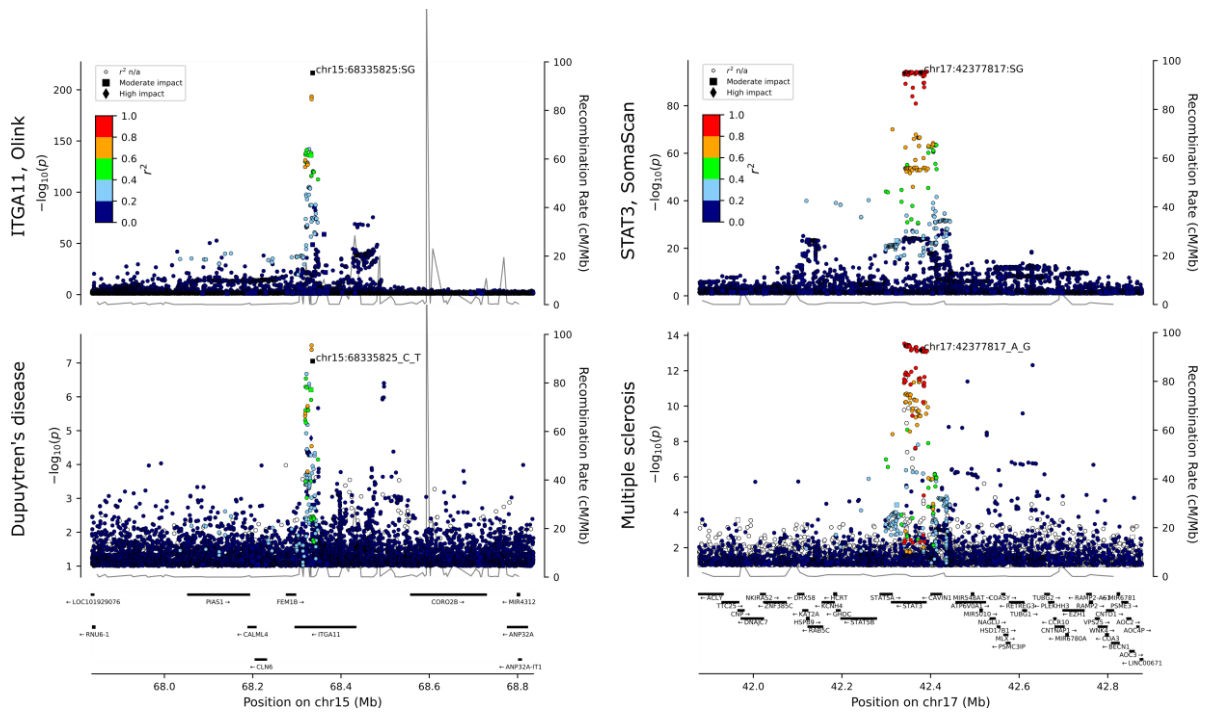

438

439

440 **Supplementary Figure SF8:** Left: Association at *ITGA11* locus between variants and *ITGA11* levels  
 441 measured using Olink Explore, and Dupuytren's disease. All  $r^2$  are shown to the same variant.

442 Right: Association at *STAT3* locus between variants and *STAT3* levels measured using SomaScan v4  
 443 (top) and multiple sclerosis risk (bottom). All  $r^2$  are shown to the same variant.

444  $p$ -values were based on a two-sided likelihood ratio test and not adjusted for multiple comparisons.

445

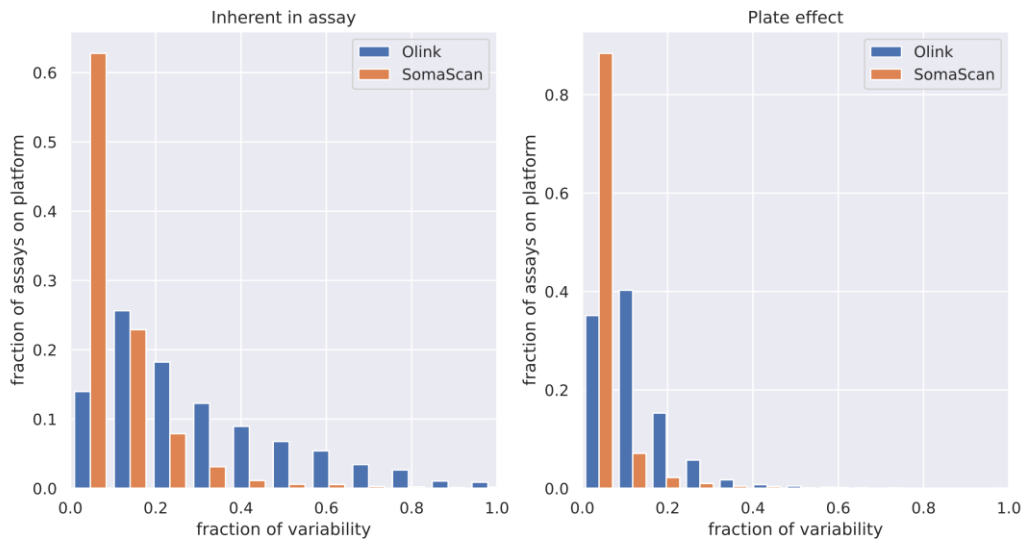

446

447 **Supplementary Figure SF9:** Fraction of total variance of the assay inherent in the assay itself (left) and

448 due to plate effect (right). Estimated using control samples from both platforms.

449

## 450 References

- 451 1. Katz, D. H. *et al.* Proteomic profiling platforms head to head: Leveraging genetics and clinical  
452 traits to compare aptamer- and antibody-based methods. *Sci. Adv.* **8**, eabm5164 (2022).
- 453 2. Raffield, L. M. *et al.* Comparison of Proteomic Assessment Methods in Multiple Cohort Studies.  
454 *Proteomics* **20**, e1900278 (2020).
- 455 3. Candia, J. *et al.* Assessment of Variability in the SOMAscan Assay. *Sci. Rep.* **7**, 1–13 (2017).
- 456 4. Ferkingstad, E. *et al.* Large-scale integration of the plasma proteome with genetics and disease.  
457 *Nat. Genet.* **53**, 1712–1721 (2021).
- 458 5. Jougasaki, M., Wei, C. M., McKinley, L. J. & Burnett, J. C. Elevation of circulating and ventricular  
459 adrenomedullin in human congestive heart failure. *Circulation* **92**, 286–289 (1995).
- 460 6. Folkersen, L. *et al.* Genomic and drug target evaluation of 90 cardiovascular proteins in 30,931  
461 individuals. *Nat. Metab.* **2**, 1135–1148 (2020).
- 462 7. Sun, B. B. *et al.* Genomic atlas of the human plasma proteome. *Nature* **558**, 73–79 (2018).
- 463 8. Pietzner, M. *et al.* Synergistic insights into human health from aptamer- and antibody-based  
464 proteomic profiling. *Nat. Commun.* **2021 121** **12**, 1–13 (2021).
- 465 9. Chen, M.-H. *et al.* Trans-ethnic and Ancestry-Specific Blood-Cell Genetics in 746,667 Individuals  
466 from 5 Global Populations. *Cell* **182**, 1198-1213.e14 (2020).
- 467 10. Johnson, A. D. *et al.* Genome-wide meta-analyses identifies seven loci associated with platelet  
468 aggregation in response to agonists. *Nat. Genet.* **42**, 608–613 (2010).
- 469 11. Pietzner, M. *et al.* Genetic architecture of host proteins involved in SARS-CoV-2 infection. *Nat.*  
470 *Commun.* **11**, 6397 (2020).
- 471 12. Elliott, P., Peakman, T. C., & on behalf of UK Biobank. The UK Biobank sample handling and  
472 storage protocol for the collection, processing and archiving of human blood and urine. *Int. J.*  
473 *Epidemiol.* **37**, 234–244 (2008).
- 474 13. Mussbacher, M. *et al.* Optimized plasma preparation is essential to monitor platelet-stored  
475 molecules in humans. *PLoS ONE* **12**, e0188921 (2017).



- 476 14. Ferkingstad, E. *et al.* Genome-wide association meta-analysis yields 20 loci associated with  
477 gallstone disease. *Nat. Commun.* **9**, 5101 (2018).
- 478 15. Pietzner, M. *et al.* Mapping the proteo-genomic convergence of human diseases. *Science* **374**,  
479 eabj1541 (2021).
- 480 16. de Rojas, I. *et al.* Common variants in Alzheimer’s disease and risk stratification by polygenic risk  
481 scores. *Nat. Commun.* **12**, 3417 (2021).
- 482 17. Buniello, A. *et al.* The NHGRI-EBI GWAS Catalog of published genome-wide association studies,  
483 targeted arrays and summary statistics 2019. *Nucleic Acids Res.* **47**, D1005–D1012 (2019).
- 484 18. International Multiple Sclerosis Genetics Consortium. Multiple sclerosis genomic map implicates  
485 peripheral immune cells and microglia in susceptibility. *Science* **365**, eaav7188 (2019).
- 486 19. Zhang, Y., Liu, Q., Yang, S. & Liao, Q. CD58 Immunobiology at a Glance. *Front. Immunol.* **12**,  
487 705260 (2021).
- 488 20. Ng, M. *et al.* A Genome-wide Association Study of Dupuytren Disease Reveals 17 Additional  
489 Variants Implicated in Fibrosis. *Am. J. Hum. Genet.* **101**, 417–427 (2017).
- 490 21. Sakaue, S. *et al.* A cross-population atlas of genetic associations for 220 human phenotypes. *Nat.*  
491 *Genet.* **53**, 1415–1424 (2021).
- 492

## Index of supplementary tables

### ST2: Assays on the Olink platform

*oid*: Internal Olink ID of assay  
*uniprot*: UniProt ID of the protein targeted by the assay  
*target\_full\_name*: Name of the protein targeted by the assay according to Olink  
*gene\_name*: Name of the gene encoding the protein targeted by the assay  
*dilution*: Dilution group of the assay (1:n)  
*cv*: CV of repeated measurements of the same sample  
*rand\_cv*: CV of randomly chosen pairs of samples from the assay  
*rand\_cv\_iceland\_1k*: *rand\_cv* on the Icelandic 1K data set

### ST3: Assays on the SomaScan platform

*seqid*: Internal SomaScan ID of the assay  
*uniprot*: UniProt ID of the protein targeted by the assay  
*target\_name*: Name of the protein targeted by the assay according to SomaLogic  
*target\_full\_name*: Full name of the protein targeted by the assay according to SomaLogic  
*gene\_name*: Name of the gene encoding the protein targeted by the assay  
*dilution*: Dilution group of the assay (1:n)  
*nonnorm\_cv*: CV of repeated measurements of the same sample, non-SMP normalized  
*nonnorm\_rand\_cv*: CV of randomly chosen pairs of samples from the assay, non-SMP normalized  
*norm\_cv*: CV of repeated measurements of the same sample, SMP normalized  
*norm\_rand\_cv*: CV of randomly chosen pairs of samples from the assay, SMP normalized  
*rand\_cv\_iceland\_1k*: *norm\_rand\_cv* on the Icelandic 1K data set, SMP normalized  
*on\_1.2k*: Was the protein included on the SomaScan 1.2k platform?

### ST6: Correlation between assays on the Olink and SomaScan platforms

*seqid*: Internal SomaScan ID of the SomaScan assay  
*oid*: Internal Olink ID of the Olink assay  
*uniprot*: UniProt ID of the target protein  
*target*: Name of the target protein  
*target\_name*: Full name of the target protein  
*gene\_name*: Name of the gene encoding the protein targeted by the assays  
*olink\_nonnorm\_corr*: Spearman correlation between protein levels measured with Olink and non-SMP normalized SomaScan assay  
*olink\_nonnorm\_pval*: Significance of *olink\_nonnorm\_corr*  
*olink\_smpnorm\_corr*: Spearman correlation between protein levels measured with Olink and SMP normalized SomaScan assay  
*olink\_smpnorm\_pval*: Significance of *olink\_smpnorm\_corr*  
*nonnorm\_smpnorm\_corr*: Spearman correlation between protein levels measured with SMP normalized and non-SMP normalized SomaScan assay  
*nonnorm\_smpnorm\_pval*: Significance of *nonnorm\_smpnorm\_corr*  
*olink\_panelset*: Inclusion of assay on Olink Explore 1536 (1) or Olink Expansion (2)

*smp\_quantile\_in\_olink*: Quantile of correlation of the corresponding assay among all SomaScan assays to the relevant Olink assay (SMP normalized)

*smp\_quantile\_in\_somascan*: Quantile of correlation of the corresponding assay among all Olink assays to the relevant SomaScan assay (SMP normalized)

*nonnorm\_quantil\_in\_olink*: Quantile of correlation of the corresponding assay among all SomaScan assays to the relevant Olink assay (non-SMP normalized)

*nonnorm\_quantile\_in\_somascan*: Quantile of correlation of the corresponding assay among all Olink assays to the relevant SomaScan assay (non-SMP normalized)

### **ST11: Median correlation of assays by tissue of preferential expression**

*tissue*: Tissue of preferential expression (according to Human Protein Atlas)

*median\_correlation*: Median of correlation coefficients for proteins preferentially expressed in the tissue

*mean\_correlation*: Mean of correlation coefficients for proteins preferentially expressed in the tissue

*n\_assay\_pairs*: Number of assay pairs targeting proteins preferentially expressed in the tissue

*n\_proteins*: Number of unique proteins targeted by both platforms and preferentially expressed in the tissue

### **ST13: Correlations of protein levels measured on Olink with subject age, sex, and sample age in the UKB data sets**

*oid*: Internal Olink ID of the assay

*uniprot*: UniProt ID of the targeted protein

*gene\_name*: Name of the gene encoding the protein

*beta\_age\_bi*: Beta of subject age in the British-Irish ancestry group

*pval\_age\_bi*: Significance of *beta\_age\_bi*

*beta\_age\_af*: Beta of subject age in the African ancestry group

*pval\_age\_af*: Significance of *beta\_age\_af*

*beta\_age\_sa*: Beta of subject age in the South-Asian ancestry group

*pval\_age\_sa*: Significance of *beta\_age\_sa*

*beta\_sex\_bi*: Beta of subject sex in the British-Irish ancestry group

*pval\_sex\_bi*: Significance of *beta\_sex\_bi*

*beta\_sex\_af*: Beta of subject sex in the African ancestry group

*pval\_sex\_af*: Significance of *beta\_sex\_af*

*beta\_sex\_sa*: Beta of subject sex in the South-Asian ancestry group

*pval\_sex\_sa*: Significance of *beta\_sex\_sa*

*beta\_sample\_age*: Beta of sample age, all ancestry groups

*pval\_sample\_age*: Significance of *beta\_sample\_age*

### **ST14: Correlations of protein levels measured on SomaScan with subject age, sex, and sample age in the Iceland data set**

*seqid*: Internal SomaScan ID of the assay

*gene\_name*: Name of the gene encoding the protein targeted by the assay

*beta age no normalization*: Beta of subject age (non-SMP normalized)  
*beta age SMP normalization*: Beta of subject age (SMP normalized)  
*pval age no normalization*: Significance of beta age no normalization  
*pval age SMP normalization*: Significance of beta age SMP normalization  
*beta sex no normalization*: Beta of subject sex (non-SMP normalized)  
*beta sex SMP normalization*: Beta of subject sex (SMP normalized)  
*pval sex no normalization*: Significance of beta sex no normalization  
*pval sex SMP normalization*: Significance of beta sex SMP normalization  
*beta sample age no normalization*: Beta of sample age (non-SMP normalized)  
*pval sample age no normalization*: Significance of beta sample age no normalization  
*beta sample age no normalization adjusted for site*: Beta of sample age (non-SMP normalized), adjusted for sample site (UVS or HERA)  
*pval sample age no normalization adjusted for site*: Significance of beta sample age no normalization adjusted for site

#### **ST15: Significant associations between protein levels on Olink and phenotypes in the UKB data set**

*oid*: Internal Olink ID for the assay  
*uniprot*: The UniProt ID of the protein targeted by the assay  
*gene\_name*: The name of the gene encoding the protein targeted by the assay  
*icd10*: ICD10 code of the phenotype  
*phenotype*: Name of the phenotype  
*OR\_BI*: Odds ratio in the BI ancestry group  
*pval\_BI*: Significance of OR\_BI  
*nbi*: Number of affected individuals in the BI ancestry group  
*OR\_AF*: Odds ratio in the AF ancestry group  
*pval\_AF*: Significance of OR\_AF  
*naf*: Number of affected individuals in the AF ancestry group  
*OR\_SA*: Odds ratio in the SA ancestry group  
*pval\_SA*: Significance of OR\_SA  
*nsa*: Number of affected individuals in the SA ancestry group  
*beta\_BI*: Beta of the association in the BI ancestry group  
*beta\_AF*: Beta of the association in the AF ancestry group  
*beta\_SA*: Beta of the association in the SA ancestry group

#### **ST16: Significant associations between protein levels on SomaScan and phenotypes in the Iceland data set**

*seqid*: Internal SomaLogic ID of the assay  
*gene\_name*: Name of the gene encoding the protein targeted by the assay  
*beta no normalization*: Beta of the association (non-SMP normalized)  
*pval no normalization*: Significance of beta no normalization  
*beta SMP normalization*: Beta of the association (SMP normalized)  
*pval SMP normalization*: Significance of beta SMP normalization  
*Phenotype*: Name of the phenotype

*ListType*: Quantitative or case-control phenotype  
*ncases*: Number of cases (case-control phenotypes)  
*ncontrols*: Number of controls (case-control phenotypes)  
*nmeasured*: Number of measurements (quantitative phenotypes)

### **ST17: Significant associations of protein levels to IBD, both Olink (UKB-BI) and SomaScan (Iceland)**

*oid*: Internal Olink assay ID  
*OR\_olink*: Odds ratio for the association on the Olink platform  
*pval\_olink*: Significance of the association on the Olink platform  
*rank\_olink*: Rank of the association on the Olink platform  
*seqid*: Internal SomaLogic assay ID  
*uniprot*: UniProt ID of the target protein  
*Gene\_name*: The name of the gene encoding the target protein  
*TargetFullName*: Full name of the targeted protein  
*OR\_somascan*: Odds ratio for the association on the SomaScan platform  
*pval\_somascan*: Significance of the association on the SomaScan platform  
*rank\_somascan*: Rank of the association on the Olink platform  
*correlation*: Correlation between protein levels measured using the assays  
*targeted\_by*: Indicator of which platforms target the protein (olink\_only, somascan\_only or olink\_somascan)  
*cis\_pqtl\_olink*: Indicator if the protein has a *cis* pQTL on the Olink platform  
*cis\_pqtl\_somascan*: Indicator if the protein has a *cis* pQTL on the SomaScan platform

### **ST18: pQTLs detected on the SomaScan platform in the Iceland data set using SMP normalized data**

*locusID global*: Global identifier of the pQTL (set of variants with  $r^2 \geq 0.80$ )  
*locusID prot*: Protein-specific indicator of sentinel pQTL association  
*gene prot*: Name of the gene encoding the protein  
*chr prot*: Chromosome of the gene encoding the protein  
*strand prot*: Strand of the gene encoding the protein  
*TSS prot*: Transcription start site of the gene encoding the protein  
*shortname prot*: Name of the targeted protein  
*longname prot*: Full name of the targeted protein  
*UniProt*: UniProt ID of the targeted protein  
*variant*: RS name of the variant associating with the protein  
*LD class size*: Number of variants in high LD ( $r^2 > 0.8$ ) with the variant  
*LD class*: Variants in high LD ( $r^2 > 0.8$ ) with the variant  
*chr var*: Chromosome of the variant  
*pos var*: Position of the variant  
*region start*: Start of the region containing the sentinel variant  
*region end*: End of the region containing the sentinel variant  
*Amin*: Minor allele of the variant  
*Amaj*: Major allele of the variant

*Info*: Imputation info of the variant  
*MAF PC*: Minor allele frequency (%)  
*cis trans*: Is the pQTL cis or trans for the protein  
*distTSS*: Distance between variant and transcription start site  
*closest genes*: List of genes close to the variant  
*cis eqtl coding genes*: List of genes that harbor a protein-altering (coding) or eQTL variant in high LD with pQTL variant  
*beta adj*: Effect (in standard deviations; SD) on protein levels; adjusted for variants of higher rank in the step-wise conditional analysis (if any)  
*beta unadj*: Marginal/unadjusted effect (in SD) on protein levels  
*mLog10pval adj*: Negative base-10 logarithm corresponding to beta adj, e.g. a value of 12 means that the p-value is  $10^{-12}$   
*mLog10pval unadj*: Negative base-10 logarithm corresponding to beta unadj, e.g. a value of 12 means that the p-value is  $10^{-12}$   
*rank locus*: Rank in step-wise conditional analysis, where sentinel variants have rank=1 and secondary variants rank 2, 3, and so on  
*count locus*: Number of significant variants in step-wise conditional analysis  
*count cis eQTL same gene*: For cis pQTL associations, the number of cis-eQTL in high LD for the gene encoding the protein with affected levels (NA for trans pQTL associations)  
*prop same direction cis eqtl same gene*: For cis pQTL associations, the proportion of cis-eQTL in high LD that have the same direction of effect for the pQTL and the eQTL for the gene encoding the protein with affected levels (NA for trans pQTL associations);  
*count cis eQTL different gene*: For cis pQTL associations, the number of cis-eQTL in high LD for genes other than the gene encoding the protein with affected levels (NA for trans pQTL associations).  
*any coding same gene*: For cis-pQTL associations, «Y» if there are protein altering variants (PAV) in high LD with the pQTL variant for the gene encoding the affected protein, «N» otherwise (NA for trans pQTL associations).  
*any coding diff gene*: For cis-pQTL associations, «Y» if there are PAV in high LD with the pQTL variant for other genes than the gene encoding the affected protein, «N» otherwise (NA for trans pQTL associations).  
*Rank Proteins per pQTL*: Ranks (in terms of significance of the sentinel pQTL association) of the associated proteins per pQTL.  
*Count Proteins per pQTL*: Count of the associated proteins per pQTL  
*Rank pQTL per protein*: Rank of the pQTL among all pQTL associated with protein  
*Count pQTL per protein*: Number of pQTLs associated with protein  
*Reported*: «Y» if pQTL association is previously reported (for same protein and any variant in high LD), «N» otherwise.  
*Reported rsid*: RSid of the variant reported (if any)  
*Reported p*: P-value of the reported association  
*Reported PMID*: PMID of the reporting article  
*Reported r2*: r2 between the reported variant and the pQTL  
*SeqId*: Internal SomaLogic ID of the assay  
*r2 joint pQTL*: Variance explained (r2) by the effect in a joint model for all variants at the locus

*Effect in joint model:* Effect estimate in a joint model for all variants at the locus

*P-value joint model:* Significance of the effect for the joint model

### **ST19: pQTLs detected on the SomaScan platform in the Iceland data using non-normalized data**

See S10

### **ST20: pQTLs detected on the Olink platform in the UKB-BI data set**

*Chrom:* Chromosome of the variant

*Pos:* Position of the variant

*OlinkID:* Internal Olink ID of the assay

*Affected Protein Gene Name:* Name of the gene encoding the associated protein

*pQTL ID:* Global identifier of the pQTL

*Region ID prot:* Protein-specific indicator of sentinel pQTL association.

*CisOrTrans:* Indicator if the pQTL association is cis or trans

*marker:* The variant associating with the protein levels

*rsName:* RS name of the variant

*MAF PC:* Minor allele frequency of the variant (%)

*Info:* Imputation info of the variant

*Amin:* Minor allele of the variant

*Amaj:* Major allele of the variant

*Log10 pval gc cor unadj:* Significance of the association without adjusting for other signals at the locus. Negative log10 of the p-value.

*Log10 pval gc cor adj:* Significance of the association, adjusted for higher-rank signals at the locus. Negative log10 of the p-value.

*Effect Amin unadj:* Effect of the minor allele of the variant without adjusting for other signals at the locus.

*Effect Amin adj:* Effect of the minor allele of the variant, adjusted for higher-rank signals at the locus.

*Rank Within Locus:* Rank in step-wise conditional analysis, where sentinel variants have rank=1 and secondary variants rank 2, 3, and so on.

*Number Within Locus:* Number of significant variants in step-wise conditional analysis.

*Sentinel Marker:* The variant at the locus with the most significant association with the protein

*Affected Protein Gene chrom:* Chromosome of the gene encoding the protein

*Affected Protein Gene chromstart:* Start of the gene

*Affected Protein Gene chromend:* End of the gene

*strand:* Strand of the gene

*TopAtLocus:* Indicator if the pQTL is the sentinel signal at the locus

*Affected Protein Gene TSS:* Transcription start site for the gene

*SameChrom:* Indicator if the gene and variant are on the same chromosome

*distanceTSSvariant:* Distance between transcription start site and variant

*rank proteins per pQTL:* rank (in terms of significance of the sentinel pQTL association) of the associated proteins per pQTL.

*count proteins per pQTL:* Count of the associated proteins per pQTL.

*rank pQTL per protein*: Rank of the pQTL among all pQTL associated with protein.

*count pQTL per protein*: Number of pQTL associated with protein.

*r2 sentinel*:  $r^2$  between the variant and the sentinel variant at the locus

*cis eQTL genes*: Genes that harbor an eQTL variant in high LD with pQTL variant

*PAV genes*: Genes that harbor a protein-altering (coding) variant in high LD with pQTL variant

*UniProt*: UniProt ID of the protein

*cis eQTL same gene*: For cis-pQTL associations, «Y» if there are cis-eQTL in high LD with the pQTL variant for other genes than the gene encoding the affected protein, «N» otherwise (NA for trans pQTL associations)

*PAV same gene*: For cis-pQTL associations, «Y» if there are protein altering variants (PAV) in high LD with the pQTL variant for other genes than the gene encoding the affected protein, «N» otherwise (NA for trans pQTL associations),

*Olink version*: Version of the Olink platform (Explore or Expansion)

*protein on soma*: Indicator if the protein is also targeted by the SomaScan platform

*r2 Joint PQTL*: Variance explained ( $r^2$ ) by the effect in a joint model for all variants at the locus

*Coef joint*: Effect of the model in a joint model of all independent variants at the locus

*Pval joint*: Significance of the variant in a joint model of all independent variants at the locus

#### **ST21: pQTLs detected on the Olink platform in the UKB-AF data set**

*Chrom*: Chromosome of the variant

*Pos*: Position of the variant

*marker*: The variant associating with the protein levels

*OlinkID*: The internal Olink ID of the assay

*mlog10pval*: Significance of the association between the variant and the protein levels. Negative  $\log_{10}$  of the p-value.

*Effect*: The effect of the variant on the protein levels.

*rsName*: The RS name of the variant

*MAF\_PC*: Minor allele frequency of the variant (%)

*Info*: Imputation info of the variant

*Amin*: Minor allele of the variant

*Amaj*: Major allele of the variant

*close\_genes*: Genes close to the variant

*prot\_gene*: The gene encoding the protein targeted by the assay

*prot\_Chrom*: Chromosome of the gene encoding the protein targeted by the assay

*prot\_TSS*: Transcription start site of the gene encoding the protein targeted by the assay

*cis\_trans*: Indicator if the pQTL is cis or trans for the protein

*Olink\_set*: Indicator to which set of Olink panels the assay belongs

*any\_PAV\_same\_gene*: For cis-pQTL associations, «Y» if there are protein altering variants (PAV) in high LD with the pQTL variant for other genes than the gene encoding the affected protein, «N» otherwise (NA for trans pQTL associations)

#### **ST22: pQTLs detected on the Olink platform in the UKB-SA data set**

See S13



### **ST23: Percentage of measurements below the LOD from each assay on the Olink platform the UKB data**

*oid*: Internal Olink ID of assay

*perc.below.lod*: Percentage of values of assay below limit of detection

### **ST24: Comparison between pQTLs detected on Olink in the UKB-AF and UKB-BI data sets**

*Chrom*: Chromosome of the variant

*Pos\_AFR*: Position of the variant in the UKB-AF data set

*Pos\_EUR*: Position of the variant in the UKB-BI data set

*marker\_AFR*: Name of the variant in the UKB-AF data set

*OlinkID*: Internal Olink ID of the assay

*mlog10pval\_AFR*: Significance of the association in the UKB-AF data set. Negative log10 of p-value.

*Effect\_AFR*: Effect of the association in the UKB-AF data set.

*rsName\_ARF*: RS name of the variant in the UKB-AF data set

*MAF\_PC\_AFR\_XAF*: Minor allele frequency of the variant in the UKB-AF data set

*Info\_AFR*: Imputation info in the UKB-AF data set

*Amin\_AFR*: Minor allele in the UKB-AF data set

*Amaj\_AFR*: Major allele in the UKB-AF data set

*close\_genes\_AFR*: Genes that are close to the variant in the UKB-AF data set

*prot\_gene*: Name of the gene encoding the targeted protein

*prot\_Chrom*: Chromosome of the gene encoding the targeted protein

*prot\_TSS*: Transcription start site of the gene encoding the targeted protein

*cis\_trans*: Indicator if the pQTL is cis or trans for the protein

*Olink\_set*: Indicator if the assay is in the 1536 or Expansion set of assays

*MAF\_flip*: Indicator if the minor alleles in the UKB-AF and UKB-BI data sets are different

*MAF\_PC\_AFR\_XBI*: Minor allele frequency of the pQTL discovered in the UKB-AF data set in the UKB-BI imputation

*MAF\_AFR\_div\_XAF\_XBI*: Ratio  $MAF\_PC\_AFR\_XAF/MAF\_PC\_AFR\_XBI$

*distance*: Distance between pQTL detected in UKB-AF data-set and pQTL detected in UKB-BI data set

*marker\_EUR*: Name of the variant in the UKB-BI data set

*mlog10pval\_EUR*: Significance of the association in the UKB-BI data set. Negative log10 of p-value.

*Effect\_EUR*: Effect of the association in the UKB-BI data set

*rsName\_EUR*: RS name of the marker in the UKB-BI data set

*MAF\_PC\_EUR*: Minor allele frequency of the marker in the UKB-BI data set

*Info\_EUR*: Imputation info in the UKB-BI data set

*Amin\_EUR*: Minor allele in the UKB-BI data set

*Amaj\_EUR*: Minor allele in the UKB-BI data set

*r2\_XAF*:  $r^2$  between the variant in the UKB-AF data set and the UKB-BI data set, calculated in the UKB-AF data set

*r2\_XBI*:  $r^2$  between the variant in the UKB-AF data set and the UKB-BI data set, calculated in the UKB-BI data set

*ldclass\_AFR\_marker*: The LD class of the variant in the UKB-AF data set  
*ldclass\_AFR\_size*: Size of the LD class of the variant in the UKB-AF data set  
*ldclass\_AFR\_rsname*: RS names of the variants in the LD class in the UKB-AF data set  
*ldclass\_EUR\_marker*: The LD class of the variant in the UKB-BI data set  
*ldclass\_EUR\_size*: Size of the LD class of the variant in the UKB-BI data set  
*ldclass\_EUR\_rsname*: RS names of the variants in the LD class in the UKB-BI data set  
*size\_ldclass\_overlap*: Number of variants common to the UKB-AF and UKB-BI LD classes  
*rsname\_ldclass\_overlap*: RS names of the variants common to the UKB-AF and UKB-BI LD classes

#### **ST25: Comparison between pQTLs detected on Olink in the UKB-SA and UKB-BI data sets**

See S17

#### **ST26: Proportion of proteins with cis pQTLs depending on dilution, subcellular location and overlap between platforms**

*Platform*: Proteomics platform (SomaScan or Olink)  
*Value Type*: Protein dilution, subcellular location or overlap  
*Value*: Value to classify by  
*Proportion of proteins with cis-pQTL*: Proportion of proteins with cis pQTL  
*Number of proteins in group*: Total number of proteins in the group

#### **ST27: Comparison of results for each protein targeted by at least one of the platforms**

*UniProt*: UniProt ID of the target protein  
*OlinkID*: Internal Olink ID of the targeted protein  
*SeqId*: Internal SomaLogic ID of the targeted protein  
*Gene*: Name of the gene encoding the targeted protein  
*olink smp corr*: Spearman correlation between the Olink and SomaScan assays (SMP normalization)  
*olink smp pval*: Significance of olink smp corr  
*Targeted Olink*: Indicator if the protein is targeted by the Olink Explore 3072 platform  
*Targeted Soma*: Indicator if the protein is targeted by the SomaScan v4 platform  
*cis pQTL olink*: Indicator if the protein has a cis pQTL in the UKB-BI Olink data  
*PAV olink*: Indicator if the protein has a pQTL in high LD with a PAV in the UKB-BI Olink data  
*eQTL olink*: Indicator if the protein has a pQTL in high LD with a cis eQTL in the UKB-BI Olink data  
*Dilution olink*: Dilution group on the Olink platform  
*cis pQTL soma*: Indicator if the protein has a cis pQTL in the Icelandic SomaScan data  
*PAV soma*: Indicator if the protein has a pQTL in high LD with a PAV in the Icelandic SomaScan data  
*eQTL soma*: Indicator if the protein has a pQTL in high LD with a cis eQTL in the Icelandic SomaScan data  
*Dilution soma*: Dilution group on the SomaScan platform  
*location*: Subcellular location of the protein  
*RNA tissue specificity*: RNA tissue specificity of the protein  
*RNA tissue specific nTPM*: RNA tissue specific normalized transcript expression values  
*Olink set*: Olink assay set (1536 or Expansion)

*N platforms tested*: Number of platforms (SomaScan or Olink) targeting the protein  
*N platforms with cis pQTL*: Number of platforms on which a cis pQTL was detected for the protein  
*cis pQTL on both and high correlation (>0.5)*: Indicator if the protein has a cis pQTL on both platforms and the correlation between levels is high  
*r2 top cis pQTL*:  $r^2$  between the top cis pQTLs on each platform  
*confidence tier*: Indicates the level of confidence. Tier 1: cis pQTL on both platforms, high correlation of levels. Tier 2: cis pQTL on at least one platform. Tier 3: cis pQTL on neither platform.

## **ST28: Correspondence of pQTLs between the Olink (UKB-BI) and SomaScan (Iceland) platforms**

*Chrom*: Chromosome of the Olink and SomaScan pQTLs  
*OLINK\_Pos*: Position of the Olink pQTL  
*r2\_UK*:  $r^2$  between Olink and SomaScan pQTL, based on UKB imputation  
*dist\_UK\_IS*: Distance between Olink and SomaScan pQTL  
*OLINK\_OlinkID*: Internal Olink assay ID  
*OLINK\_UniProt*: UniProt ID of protein  
*OLINK\_gene\_prot*: Gene symbol of gene encoding protein  
*OLINK\_pQTL\_ID*: Global identifier of the Olink pQTL  
*OLINK\_cis\_trans*: Indicator if the pQTL association is cis or trans  
*OLINK\_rsName*: RS name of the Olink pQTL  
*OLINK\_MAF\_PC*: Minor allele frequency of the Olink pQTL (%)  
*OLINK\_close\_genes*: Closest genes to the Olink pQTL  
*OLINK\_mLog10pval\_unadj*: Significance of the Olink pQTL association without adjusting for other signals at the locus. Negative log10 of the p-value.  
*OLINK\_mLog10pval\_adj*: Significance of the Olink pQTL association, adjusted for higher-rank signals at the locus. Negative log10 of the p-value.  
*OLINK\_beta\_unadj*: Effect of the minor allele of the Olink pQTL variant without adjusting for other signals at the locus.  
*OLINK\_beta\_adj*: Effect of the minor allele of the Olink pQTL variant, adjusted for higher-rank signals at the locus.  
*OLINK\_rank\_locus*: Rank in step-wise conditional analysis for Olink pQTL, where sentinel variants have rank=1 and secondary variants rank 2, 3, and so on  
*OLINK\_count\_locus*: Number of significant variants in step-wise conditional analysis for Olink pQTL  
*OLINK\_rank\_proteins\_per\_pQTL*: For Olink pQTL: Rank (in terms of significance of the sentinel pQTL association) of the associated proteins per pQTL.  
*OLINK\_count\_proteins\_per\_pQTL*: For Olink pQTL: Count of the associated proteins per pQTL  
*OLINK\_rank\_pQTL\_per\_protein*: For Olink pQTL: Rank of the pQTL among all pQTL associated with protein.  
*OLINK\_count\_pQTL\_per\_protein*: For Olink pQTL: Number of pQTL associated with protein  
*SOMA\_Pos*: Position of the SomaScan pQTL  
*SOMA\_locusID\_global*: Global identifier of the SomaScan pQTL  
*SOMA\_SeqId*: Internal SomaScan assay ID  
*SOMA\_variant*: RS name of the SomaScan pQTL  
*SOMA\_MAF\_PC*: Minor allele frequency of the SomaScan pQTL (%)

*SOMA\_cis\_trans*: Indicator if the pQTL association is cis or trans

*SOMA\_closest\_genes*: Closest genes to the Olink pQTL

*SOMA\_cis\_eqtl\_coding\_genes*: List of genes that harbor a protein-altering (coding) or eQTL variant in high LD with pQTL variant

*SOMA\_beta\_unadj*: Marginal/unadjusted effect (in SD) of SomaScan pQTL on protein levels

*SOMA\_beta\_adj*: Effect (in standard deviations; SD) of SomaScan pQTL on protein levels; adjusted for variants of higher rank in the step-wise conditional analysis (if any)

*SOMA\_mLog10pval\_unadj*: Negative base-10 logarithm corresponding to beta unadj, e.g. a value of 12 means that the p-value is  $10^{-12}$

*SOMA\_mLog10pval\_adj*: Negative base-10 logarithm corresponding to beta adj, e.g. a value of 12 means that the p-value is  $10^{-12}$

*SOMA\_rank\_locus*: Rank in step-wise conditional analysis for SomaScan pQTL, where sentinel variants have rank=1 and secondary variants rank 2, 3, and so on

*SOMA\_count\_locus*: Number of significant variants in step-wise conditional analysis for Olink pQTL

*SOMA\_rank\_proteins\_per\_pQTL*: For SomaScan pQTL: Rank (in terms of significance of the sentinel pQTL association) of the associated proteins per pQTL.

*SOMA\_count\_proteins\_per\_pQTL*: For SomaScan pQTL: Count of the associated proteins per pQTL

*SOMA\_rank\_pQTL\_per\_protein*: For SomaScan pQTL: Rank of the pQTL among all pQTL associated with protein.

*SOMA\_count\_pQTL\_per\_protein*: For SomaScan pQTL: Number of pQTL associated with protein

## **ST29: Pleiotropic trans pQTLs on the Olink (UKB-BI) and SomaScan (Iceland) platforms**

*Chrom*: Chromosome of variant

*Olink Pos (hg38)*: Position of associated variant on Olink

*Highly Pleiotropic Olink*: Indicator if the variant is highly pleiotropic on Olink

*Highly Pleiotropic Soma SMP*: Indicator if the variant is highly pleiotropic on SomaScan with SMP normalization

*Highly Pleiotropic Soma PCO*: Indicator if the variant is highly pleiotropic on SomaScan without SMP normalization

*r2 SMP Olink*:  $r^2$  between the corresponding variants in the Olink data and the SMP normalized SomaScan data

*distance SMP olink*: Distance between the corresponding variants in the Olink data and the SMP normalized SomaScan data

*r2 PCO Olink*:  $r^2$  between the corresponding variants in the Olink data and the non-SMP normalized SomaScan data

*distance PCO olink*: Distance between the corresponding variants in the Olink data and the non-SMP normalized SomaScan data

*Olink nprot*: Number of proteins associating with the variant in the Olink data

*Soma SMP nprot*: Number of proteins associating with the variant in the SMP normalized SomaScan data

*Soma PCO nprot*: Number of proteins associating with the variant in the non-SMP normalized SomaScan data

*nprot SMP div nprot Olink*: Soma SMP nprot / Olink nprot

*nprot PCO div nprot Olink*: Soma PCO nprot / Olink nprot

*nprot SMP div nprot PCO*: Soma SMP nprot / Soma PCO nprot  
*Olink Name*: Name of associated variant in the Olink data  
*Olink rsName*: RS name of the associated variant in the Olink data  
*Olink MAF PC*: Minor allele frequency of the associated variant in the Olink data (%)  
*Olink close genes*: Genes close to the associated variant in the Olink data  
*Soma SMP Pos*: Position of the associated variant in the SomaScan data using SMP normalization  
*Soma SMP Name*: Name of the associated variant in the SomaScan data using SMP normalization  
*Soma SMP rsName*: RS name of the associated variant in the SomaScan data using SMP normalization  
*Soma SMP MAF PC*: Minor allele frequency of the associated variant in the SomaScan data using SMP normalization (%)  
*Soma SMP close genes*: Genes close to the associated variant in the SomaScan data using SMP normalization  
*Soma PCO Pos*: Position of the associated variant in the non-SMP normalized SomaScan data  
*Soma PCO Name*: Name of the associated variant in the non-SMP normalized SomaScan data  
*Soma PCO rsName*: RS name of the associated variant in the non-SMP normalized SomaScan data  
*Soma PCO MAF PC*: Minor allele frequency of the associated variant in the non-SMP normalized SomaScan data (%)  
*Soma PCO close genes*: Genes close to the associated variant in the non-SMP normalized SomaScan data

### **ST30: Correspondence between pleiotropic trans pQTLs on the Olink (UKB-BI) and SomaScan (Iceland) platforms**

*Chrom*: Chromosome of the variant  
*Pos (hg38)*: Position of the variant  
*rsName*: RS name of the variant  
*MAF (%)*: Minor allele frequency of the variant (%)

### **ST31: Cis pQTLs in high LD with disease-associated variants from the GWAS catalog**

*Chrom*: Chromosome of the variant  
*Pos*: Position of the variant  
*variant*: Variant name  
*pQTL ID*: ID of the pQTL (including platform)  
*Olink ID*: Internal Olink ID of the assay  
*SeqId*: Internal SomaLogic ID of the assay  
*gene prot*: Name of the gene encoding the targeted protein  
*close genes*: Genes close to the variant  
*source*: Source of the pQTL (Olink data, SMP normalized SomaScan data, non-SMP normalized SomaScan data)  
*r2*: r2 between the pQTL variant and the variant in the GWAS catalog  
*GWAS EFO*: Experimental Factor Ontology reported in the GWAS catalog  
*GWAS RSID*: RS name of the variant in the GWAS catalog  
*GWAS P*: Significance of the association reported in the GWAS catalog

*GWAS PMID*: PubMed ID of the article reporting the association in the GWAS catalog  
*GWAS PHENO*: Phenotype reported in the GWAS catalog  
*GWAS PHENO TEXT*: Information describing context of GWAS phenotype (e.g. females, smokers).  
*pQTL log<sub>10</sub> p*: Significance of the pQTL association. Negative log<sub>10</sub> of p-value.  
*pQTL Effect amin*: Effect of the minor allele of the pQTL  
*MAF PC*: Minor allele frequency of the pQTL variant (%)  
*credible set*: Indicator if the GWAS catalog variant is included in the credible set of variants for the pQTL

### **ST32: Trans pQTLs in high LD with disease-associated variants from the GWAS catalog**

*Chrom*: Chromosome of the variant  
*pQTL ID*: ID of the pQTL (including platform)  
*Olink ID*: Internal ID of the Olink assay  
*gene prot*: Name of the gene encoding the protein  
*N prot*: Number of proteins associating with the variant  
*GWAS EFO*: Experimental Factor Ontology reported in the GWAS catalog  
*N GWAS EFO*: Number of EFOs reported in the GWAS catalog  
*GWAS RSID*: RS name of variants reported in the GWAS catalog  
*MAF PC*: Minor allele frequency of the pQTL variant (%)  
*prop in credible set*: Proportion of the GWAS catalog variants included in the credible set of variants for the pQTL  
*source*: Platform where the pQTL was detected  
*gene at locus*: Closest gene to pQTL variant  
*linked protein(s)*: Proteins among the associated proteins ("gene prot") that are linked to "gene at locus" according to STRING database (see below)  
*STRING score(s)*: STRING scores corresponding to linked proteins

### **ST33: Summary of the numbers of pQTLs associating with disease-associated variants from the GWAS catalog using LD and / or credible sets**

*Platform*: Platform where the pQTL is detected  
*Entity*: Objects being counted  
*Total count r<sup>2</sup> only*: Number of pairs of items where the associated variants are in high LD  
*Cis only count r<sup>2</sup> only*: Number of pairs of items involving only cis pQTL associations where the associated variants are in high LD  
*Trans only count r<sup>2</sup> only*: Number of pairs items involving only trans pQTL associations where the associated variants are in high LD  
*Cis and Trans count r<sup>2</sup> only*: Number of pairs items involving both cis and trans pQTL associations where the associated variants are in high LD  
*Total count r<sup>2</sup> and credible set*: Number of pairs of items where the associated variants are in high LD and the GWAS catalog variant is in the credible set for the pQTL association.  
*Cis only count r<sup>2</sup> and credible set*: Number of pairs of items involving only cis pQTL associations where the associated variants are both in high LD and the GWAS catalog variant is in the credible set for the pQTL association.

*Trans only count r2 and credible set:* Number of pairs of items involving only cis pQTL associations where the associated variants are both in high LD and the GWAS catalog variant is in the credible set for the pQTL association.

*Cis and Trans count r2 and credible set:* Number of pairs items involving both cis and trans pQTL associations where the associated variants are in high LD and the GWAS catalog variant is in the credible set for the pQTL association.

### **ST35: Replication of pQTLs detected in the Olink data (UKB-BI) in the Icelandic Olink data (n=1,514)**

*Chrom:* Chromosome of variant

*Pos:* Position of variant

*Name:* Name of variant

*OlinkID:* Internal Olink ID of assay

*Affected\_Protein\_Gene\_name:* Name of the gene encoding the protein

*pQTL\_ID:* ID of the pQTL

*cis\_trans:* Indicator if the pQTL is cis or trans for the protein

*rsName:* RS name of the variant

*MAF\_PC:* Minor allele frequency of the variant (%)

*Info:* Imputation info of the variant

*Amin:* Minor allele of the variant

*Amaj:* Major allele of the variant

*close\_genes:* Genes close to the variant

*Log10\_Pval\_UK:* Significance of the pQTL in the UKB-BI data. Negative log10 of the p-value.

*Effect\_Amin\_UK:* Effect of the minor allele in the UKB-BI data.

*Pval\_Iceland:* Significance of the pQTL in the Icelandic Olink data

*Effect\_Amin\_Iceland:* Effect of the minor allele in the Icelandic Olink data

*Same\_Direction:* Indicator if the direction of effect in the UKB-BI and Icelandic Olink data is concordant

*Replicates:* Indicator if the UKB-BI association is replicated in the Icelandic Olink data (P<0.05)

### **ST36: Replication of pQTLs detected in the Olink data (UKB-BI) in the SomaScan data (Iceland)**

*Chrom:* Chromosome of the variant

*Pos\_IS:* Position of the variant in the Icelandic data

*Name\_IS:* Name of the variant in the Icelandic data

*Pos\_UK:* Position of the variant in the UKB-BI data

*Name\_UK:* Name of the variant in the UKB-BI data

*pQTL\_ID:* pQTL ID in the UKB-BI data

*cis\_trans:* Indicator if the pQTL is cis or trans for the protein

*gene\_prot:* Name of the gene encoding the protein

*SeqId:* Internal SomaLogic assay ID

*OlinkID:* Internal Olink assay ID

*rsName:* RS name of the variant

*close\_genes:* Genes close to the variant

*Amin:* Minor allele of the variant

*Amaj*: Major allele of the variant  
*Info\_UK*: Imputation info in the UKB-BI data set  
*MAF\_PC\_UK*: Minor allele frequency of the variant in the UKB-BI data set (%)  
*Info\_IS*: Imputation info in the Icelandic data set  
*MAF\_PC\_IS*: Minor allele frequency of the variant in the Icelandic data set (%)  
*P\_UK*: Significance of the association in the UKB-BI data set  
*Effect\_Amin\_UK*: Effect of the minor allele in the UKB-BI data set  
*P\_IS*: Significance of the association in the Icelandic data set  
*Effect\_Amin\_IS*: Effect of the minor allele in the Icelandic data set  
*same\_direction*: Indicator if the direction of effect is concordant between the UKB-BI and Icelandic data sets  
*P\_repl\_nom*: The replication in the Icelandic data set is nominally significant  
*P\_repl\_bonf*: The replication in the Icelandic data set reaches Bonferroni-corrected significance

### **ST37: Replication of pQTLs detected in the SomaScan data (Iceland) in the Olink data (UKB-BI)**

See S21

### **ST38: Correlation between pQTLs and credible set variants for pQTLs detected using Olink in the UKB-BI data set**

*Chrom*: Chromosome of the variant  
*Pos*: Position of the variant  
*OlinkID*: The internal Olink ID of the assay  
*Affected\_Protein\_Gene\_name*: Name of the gene encoding the associated protein  
*pQTL\_ID*: Global identifier of the pQTL  
*region\_ID\_prot*: Protein-specific indicator of sentinel pQTL association  
*CisOrTrans*: Indicator if the pQTL association is cis or trans  
*Marker*: The variant associating with the protein levels  
*rsName*: RS name of the variant  
*MAF\_PC*: Minor allele frequency of the variant (%)  
*Info*: Imputation info of the variant  
*Amin*: Minor allele of the variant  
*Amaj*: Major allele of the variant  
*close\_genes*: Closest genes to the variant  
*Log10\_pval\_gc\_cor\_unadj*: Significance of the association without adjusting for other signals at the locus. Negative log10 of the p-value.  
*Log10\_pval\_gc\_cor\_adj*: Significance of the association, adjusted for higher-rank signals at the locus. Negative log10 of the p-value.  
*Effect\_Amin\_unadj*: Effect of the minor allele of the variant without adjusting for other signals at the locus.  
*Effect\_Amin\_adj*: Effect of the minor allele of the variant, adjusted for higher-rank signals at the locus.  
*RankWithinLocus*: Rank in step-wise conditional analysis, where sentinel variants have rank=1 and secondary variants rank 2, 3, and so on



*NumberWithinLocus*: Number of significant variants in step-wise conditional analysis

*SentinelMarker*: The variant at the locus with the most significant association with the protein

*Affected\_Protein\_Gene\_chrom*: Chromosome of the gene encoding the protein

*Affected\_Protein\_Gene\_chromstart*: Start of the gene

*Affected\_Protein\_Gene\_chromend*: End of the gene

*Strand*: Strand of the gene

*cis\_eQTL\_genes*: Genes that harbor an eQTL variant in high LD with pQTL variant

*PAV\_genes*: Genes that harbor a protein-altering (coding) variant in high LD with pQTL variant

*UniProt*: UniProt ID of the protein

*r2cor\_est*: Estimated correlation between a)  $r^2$  between the sentinel pQTL and other variants in the credible set, calculated in the UKB dataset and b)  $r^2$  between the sentinel pQTL and other variants in the credible set, calculated in the Icelandic dataset

*r2cor\_l95*: Lower limit of 95% confidence interval corresponding to *r2cor\_est*.

*r2cor\_u95*: Upper limit of 95% confidence interval corresponding to *r2cor\_est*.

*r2\_IS\_min*: Minimum  $r^2$  between the sentinel pQTL and other variants in the credible set, calculated in the Icelandic dataset

*r2\_IS\_median*: Median  $r^2$  between the sentinel pQTL and other variants in the credible set, calculated in the Icelandic dataset

*r2\_IS\_mean*: Mean  $r^2$  between the sentinel pQTL and other variants in the credible set, calculated in the Icelandic dataset

*r2\_IS\_max*: Maximum  $r^2$  between the sentinel pQTL and other variants in the credible set, calculated in the Icelandic dataset

*r2\_UK\_min*: Minimum  $r^2$  between the sentinel pQTL and other variants in the credible set, calculated in the UKB dataset

*r2\_UK\_median*: Median  $r^2$  between the sentinel pQTL and other variants in the credible set, calculated in the UKB dataset

*r2\_UK\_mean*: Mean  $r^2$  between the sentinel pQTL and other variants in the credible set, calculated in the UKB dataset

*r2\_UK\_max*: Maximum  $r^2$  between the sentinel pQTL and other variants in the credible set, calculated in the UKB dataset

*n\_r2*: Number of pairs of  $r^2$  values used in the calculation of the estimated correlation in *r2cor\_est*

### **ST39: Correlation between pQTLs and credible set variants for pQTLs detected using SomaScan in the Icelandic data set**

*Chrom*: Chromosome of the variant

*Pos*: Position of the variant

*Marker*: The variant associating with the protein levels

*SeqId*: The SomaLogic internal ID of the assay

*locusID\_global*: Global identifier of the pQTL

*locusID\_prot*: Protein-specific indicator of sentinel pQTL association

*gene\_prot*: Name of the gene encoding the associated protein

*chr\_prot*: Chromosome of the gene encoding the protein

*strand\_prot*: Strand of the gene

*TSS\_prot*: Start of the gene transcription site

*shortname\_prot*: Name of the protein  
*longname\_prot*: Full name of the protein  
*UniProt*: UniProt ID of the protein  
*Variant*: RS name of the variant (if applicable)  
*LD\_class\_size*: Number of variants in high LD with the variant  
*LD\_class*: Variants in high LD with the variant  
*region\_start*  
*region\_end*  
*Amin*: Minor allele of the variant  
*Amaj*: Major allele of the variant  
*Info*: Imputation info of the variant  
*MAF\_PC*: Minor allele frequency of the variant (%)  
*cis\_trans*: Indicator if the pQTL association is in cis or trans  
*closest\_genes*: Closest genes to the variant  
*cis\_eqtl\_coding\_genes*: Genes that harbor an eQTL variant in high LD with pQTL variant  
*beta\_adj*: Effect of the minor allele of the variant, adjusted for higher-rank signals at the locus  
*beta\_unadj*: Effect of the minor allele of the variant without adjusting for other signals at the locus  
*mLog10pval\_adj*: Significance of the association, adjusted for higher-rank signals at the locus.  
     Negative log10 of the p-value  
*mLog10pval\_unadj*: Significance of the association without adjusting for other signals at the locus.  
     Negative log10 of the p-value  
*rank\_locus*  
*count\_locus*  
*count\_cis\_eQTL\_same\_gene*  
*prop\_same\_direction\_cis\_eqtl\_same\_gene*  
*count\_cis\_eQTL\_diff\_gene*  
*any\_coding\_same\_gene*  
*any\_coding\_diff\_gene*  
*Rank\_Proteins\_per\_Locus*  
*Count\_Proteins\_per\_Locus*  
*Rank\_Loci\_per\_Protein*  
*Count\_Loci\_per\_Protein*  
*Reported*  
*Reported\_rsid*  
*Reported\_P*  
*Reported\_PMID*  
*Reported\_r2*  
*r2cor\_est*: Estimated correlation between a)  $r^2$  between the sentinel pQTL and other variants in the credible set, calculated in the UKB dataset and b)  $r^2$  between the sentinel pQTL and other variants in the credible set, calculated in the Icelandic dataset  
*r2cor\_l95*: Lower limit of 95% confidence interval corresponding to *r2cor\_est*.  
*r2cor\_u95*: Upper limit of 95% confidence interval corresponding to *r2cor\_est*.  
*r2\_IS\_min*: Minimum  $r^2$  between the sentinel pQTL and other variants in the credible set, calculated in the Icelandic dataset

*r2\_IS\_median*: Median  $r^2$  between the sentinel pQTL and other variants in the credible set, calculated in the Icelandic dataset

*r2\_IS\_mean*: Mean  $r^2$  between the sentinel pQTL and other variants in the credible set, calculated in the Icelandic dataset

*r2\_IS\_max*: Maximum  $r^2$  between the sentinel pQTL and other variants in the credible set, calculated in the Icelandic dataset

*r2\_UK\_min*: Minimum  $r^2$  between the sentinel pQTL and other variants in the credible set, calculated in the UKB dataset

*r2\_UK\_median*: Median  $r^2$  between the sentinel pQTL and other variants in the credible set, calculated in the UKB dataset

*r2\_UK\_mean*: Mean  $r^2$  between the sentinel pQTL and other variants in the credible set, calculated in the UKB dataset

*r2\_UK\_max*: Maximum  $r^2$  between the sentinel pQTL and other variants in the credible set, calculated in the UKB dataset

*n\_r2*: Number of pairs of  $r^2$  values used in the calculation of the estimated correlation in *r2cor\_est*
